# Supplementary material for: Shared genome analyses of notable listeriosis outbreaks, highlighting the critical importance of epidemiological evidence, input datasets and interpretation criteria
Source: PubMed Central journal article supplement (PMC6412057; doi:10.1099/mgen.0.000237), 2019-01-16
Supplement: mgen-5-237-s001.pdf [file mgen-5-237-s001.pdf]

## SUPPLEMENTAL DATA

**Figure S1. Robustness of reference-based shared genome hqSNV analysis pipeline.** Maximum likelihood phylogenetic analyses for 39 *L. monocytogenes* isolates using data collected in (A) 2010 using GAIIx/454/Sanger and (B) 2014 using high quality MiSeq data (136,302 and 142,935 shared hqSNVs, respectively) (refer to **Methods**). Technical sequencing replicates generated by different platforms, laboratories/users, sample preparation methods, and with various data qualities and read lengths exhibit similar phylogenetic topologies and genetic distances. Genetic distance bars indicating the shared hqSNV frequency are shown. Reference genome: 08-5578 (3,032,624 bp); shared genome sizes: 2,554,801 bp (2010 data set) and 2,596,205 bp (2014 data set).

**Figure S2. Species-wide *L. monocytogenes* shared genome hqSNV phylogeny.** Species-wide shared hqSNV phylogeny for *L. monocytogenes* isolates ( $n=52$ , 9 distinct outbreaks). A total of 143,045 hqSNV positions were identified across a shared genome of 2,595,673 bp. Reference genome: 08-5578. Additional details in **Methods**. (A) Minimum spanning tree, Isolates are colour-coded by epidemiology (inset). MLST clonal complex (CC) groups and number of hqSNVs between isolates are indicated. Food isolate, f; food processing equipment isolate, e; ready-to-eat, RTE. (B) Maximum likelihood tree.

**Figure S3. *L. monocytogenes* Lineage I shared hqSNV phylogeny.** Shared hqSNV phylogeny for lineage I *L. monocytogenes* isolates ( $n=11$ , 4 distinct outbreaks). A total of 15,435 hqSNV positions were identified across a shared genome of 2,720,701 bp. Reference genome: 81-0861. Additional details in **Methods**. (A) Minimum spanning tree; Isolates are colour-coded by epidemiology (inset); MLST clonal complex (CC) groups and number of hqSNVs between isolates are indicated; Food isolate, f; food processing equipment isolate, e; ready-to-eat, RTE. (B) Maximum likelihood tree.

**Figure S4. *L. monocytogenes* CC8 shared hqSNV phylogeny.** Shared hqSNV phylogeny for Clonal Complex 8 (CC8) lineage II *L. monocytogenes* isolates ( $n=32$ , 2 distinct outbreaks and 15 sporadic cases) (**Table S1**). A total of 361 hqSNV positions were identified across a shared genome of 2,790,598 bp. Reference genome: 08-5578. (A) Minimum spanning tree (B) Maximum likelihood tree. Isolates are colour-coded by epidemiology (inset). MLST clonal complex (CC) groups and number of hqSNVs between isolates are indicated. Food isolate, f; food processing equipment isolate, e; ready-to-eat, RTE.

**Figure S5. Population structure of clinical *Listeria monocytogenes* in Canada.** The population structure of 536 disease-causing *L. monocytogenes* from Canada (1981-2013) represented by a 7-gene MLST-based minimum-spanning tree generated in BioNumerics v6.5 [1]. Nodes correspond to sequence type (ST); node diameters are proportional the frequency of each ST, and the serotype is indicated (colour legend). Branch numbers show the number of allelic differences between connected STs. Grey zones identify STs in the same clonal complex (CC).

**Figure S6. Whole-genome Comparison of Canadian Isolates With Publicly Available *L. monocytogenes* Genomes.** Neighbour-joining phylogeny of 39 finished *L. monocytogenes*

Canadian genomes (**Table S1**) and 23 publically available genomes (**Table S7**) based on global pairwise alignments generated using ClustalW [2] and MAUVE v20150226 [3]. Epidemiologically related isolates listed in are highlighted, and serotypes and lineages are shown. The blue zone indicated CC8 isolates. A genetic distance bar (bottom left) is indicated.

**Figure S7. PFGE analysis of *L. monocytogenes* isolates in this study.** PFGE dendrograms for 42 *L. monocytogenes* isolates were generated using standard PulseNet protocols and BioNumerics v6.5 and *AscI* (**Panel A**) or *ApaI* (**Panel B**) restriction enzymes. The PFGE pattern identification and *p*-values for dendrogram nodes are shown. NLEP#, isolate name. Additional details in **Methods**.

**Table S1.** Canadian *Listeria monocytogenes* isolates analyzed in this study.

**Table S2A.** Shared hqSNV matrix for 39 *L. monocytogenes* isolates sequenced in 2010. A total of 136,302 hqSNV positions were identified across a shared genome of 2,554,801 bp. Reference genome: 08-5578. Additional details in **Methods**.

**Table S2B.** Shared hqSNV matrix for 39 *L. monocytogenes* isolates sequenced in 2013. A total of 142,935 hqSNV positions were identified across a shared genome of 2,596,205 bp. Reference genome: 08-5578. Additional details in **Methods**.

**Table S3.** Species-wide shared hqSNV matrix for *L. monocytogenes* isolates ( $n=52$ , 9 distinct outbreaks). A total of 143,045 hqSNV positions were identified across a shared genome of 2,595,673 bp. Reference genome: 08-5578. Additional details in **Methods**.

**Table S4.** Shared hqSNV matrix for lineage I *L. monocytogenes* isolates ( $n=11$ , 4 distinct outbreaks). A total of 15,435 hqSNV positions were identified across a shared genome of 2,720,701 bp. Reference genome: 81-0861. Additional details in **Methods**.

**Table S5.** Shared hqSNV matrix for lineage II *L. monocytogenes* isolates ( $n=41$ , 5 distinct outbreaks). A total of 49,359 hqSNV positions were identified across a shared genome of 2,709,893 bp. Reference genome: 08-5578. Additional details in **Methods**.

**Table S6.** Shared hqSNV matrix for Clonal Complex 8 (CC8) lineage II *L. monocytogenes* isolates ( $n=32$ , 2 distinct outbreaks and 15 sporadic cases) (**Table S1**). A total of 361 hqSNV positions were identified across a shared genome of 2,790,598 bp. Reference genome: 08-5578. Additional details in **Methods**.

**Table S7.** Publically available *Listeria monocytogenes* genomes used in this study.

**Table S8.** Sequences of substituted primers used for MLST.

A

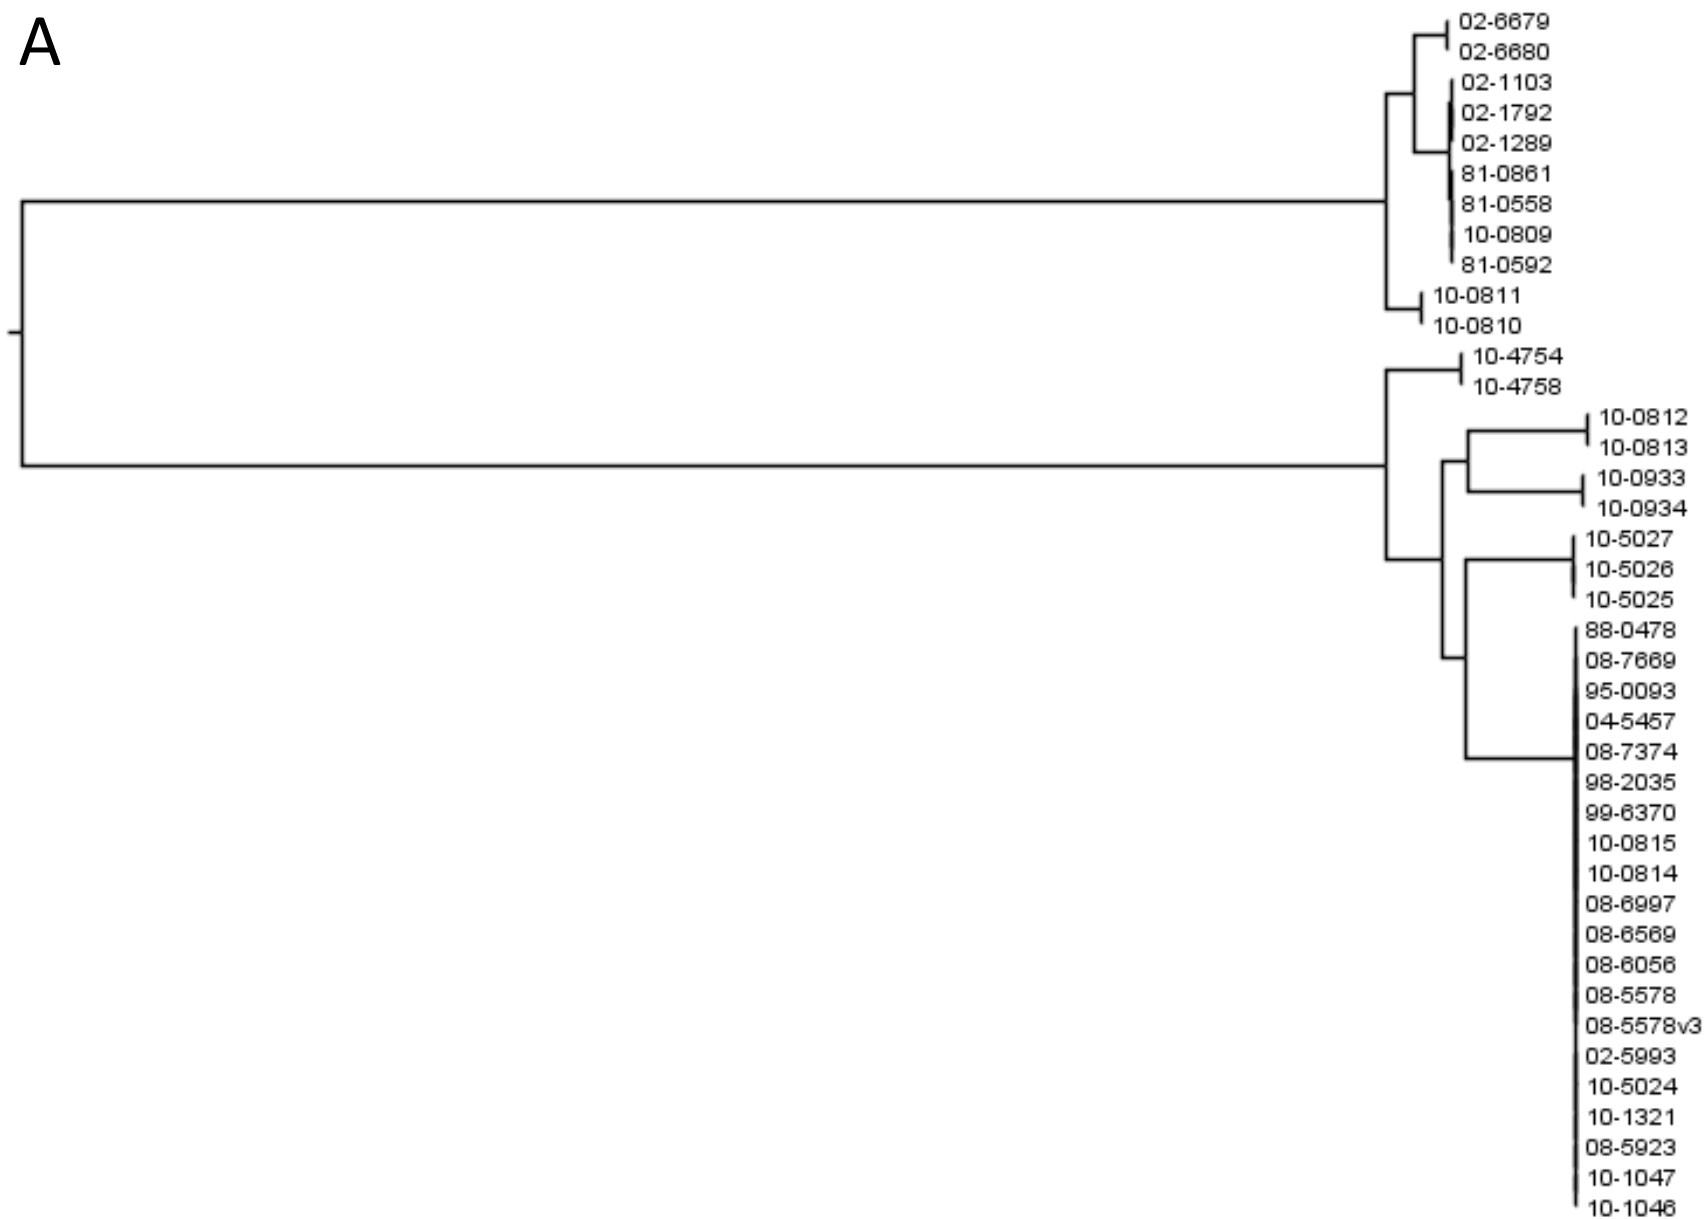

FIGURE S1A

0.2

B

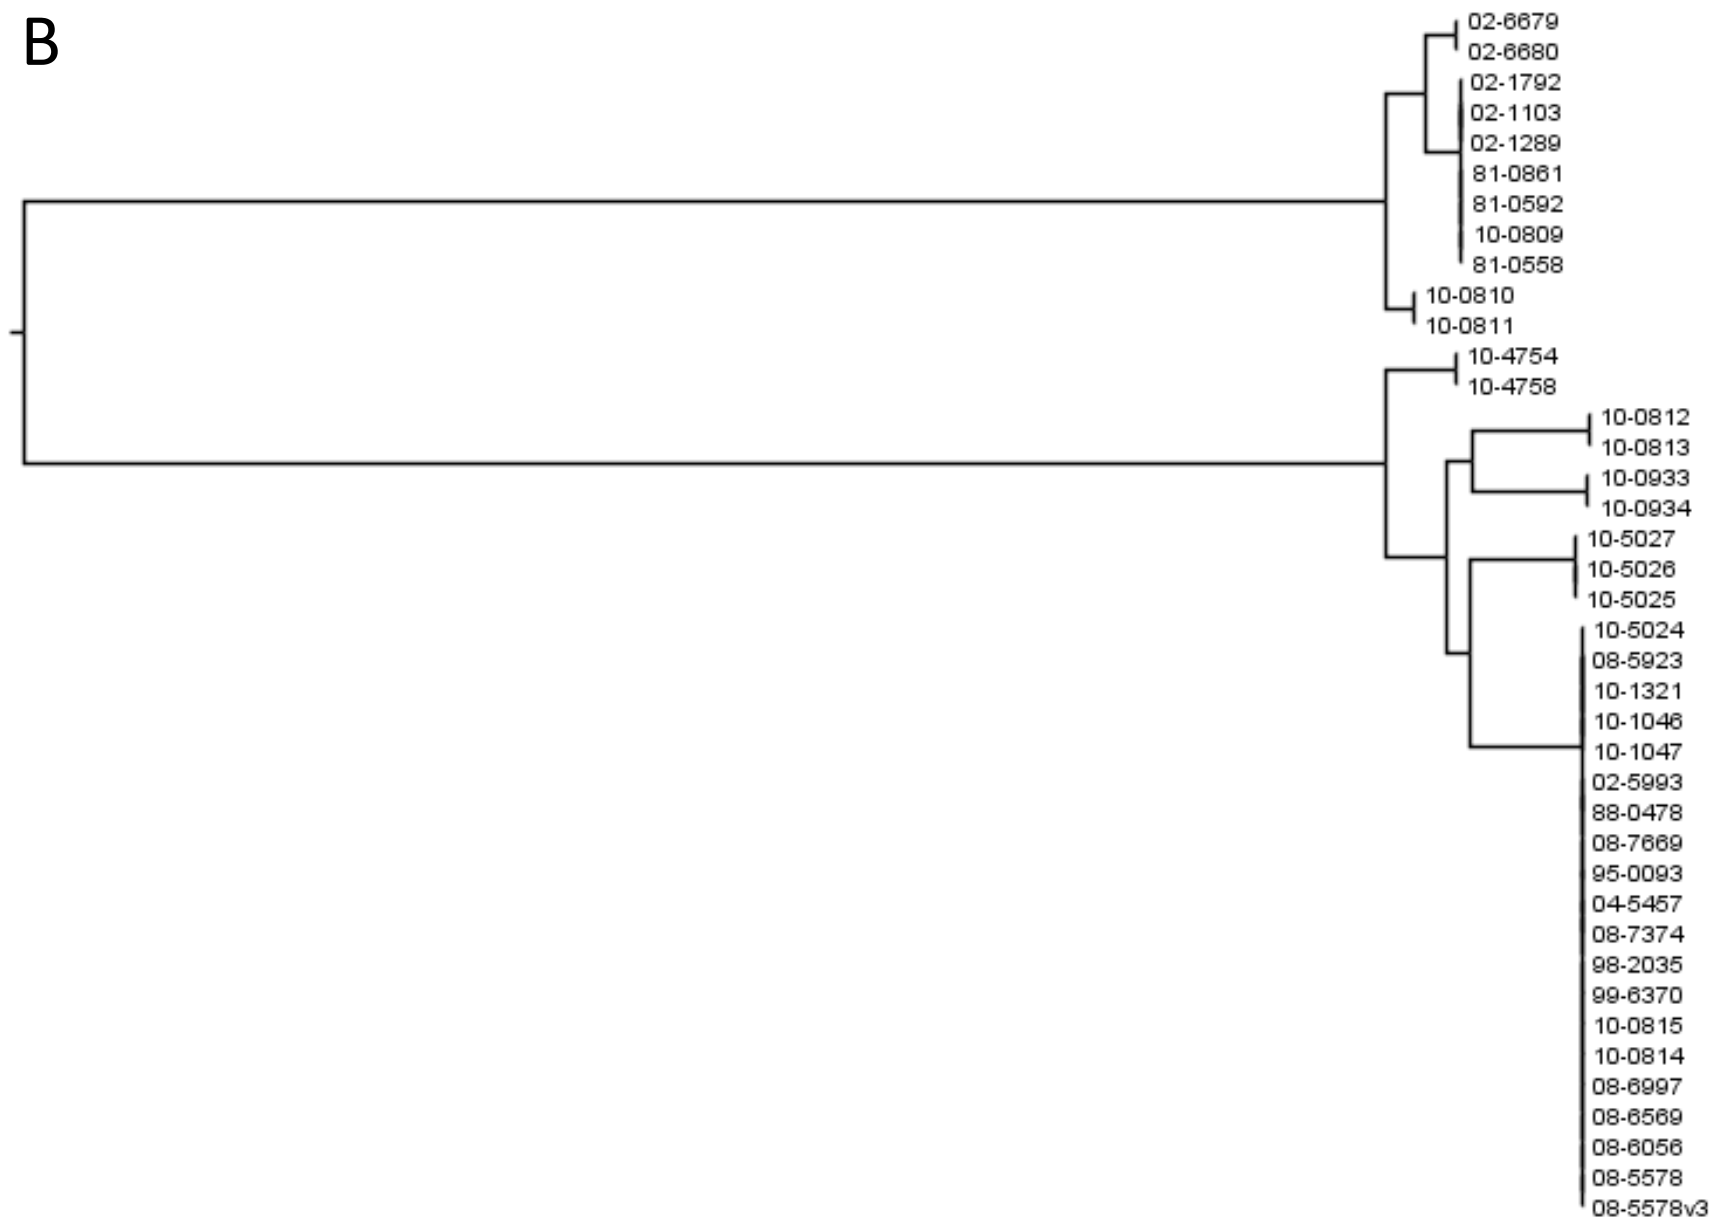

FIGURE S1B

0.2

### Key

- Coleslaw outbreak, 1981
- Imitation crab outbreak, 1996
- Whipping cream outbreak, 2000
- Cheese A outbreak, 2002
- Cheese B outbreak, 2002
- Cheese C outbreak, 2002
- Cheese D outbreak, 2008
- RTE delimeat outbreak, 2008
- RTE prosciutto outbreak, 2010
- Sporadic isolates + FPE

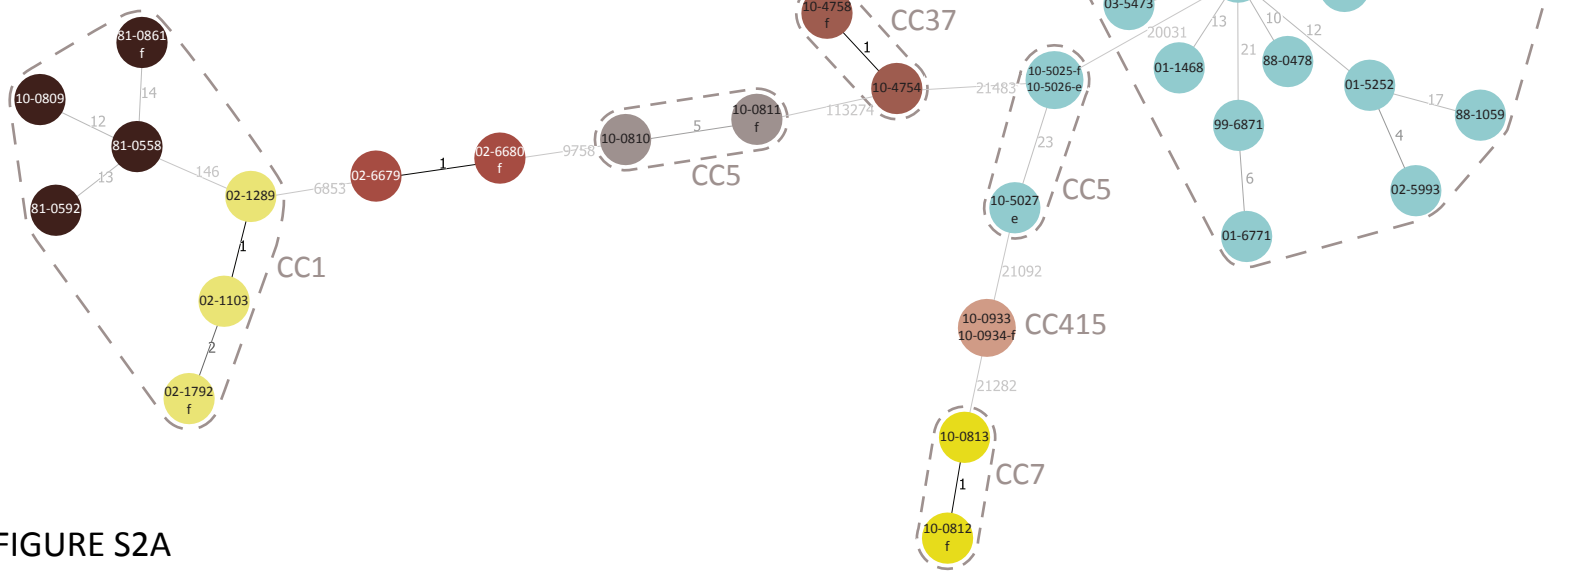

FIGURE S2A

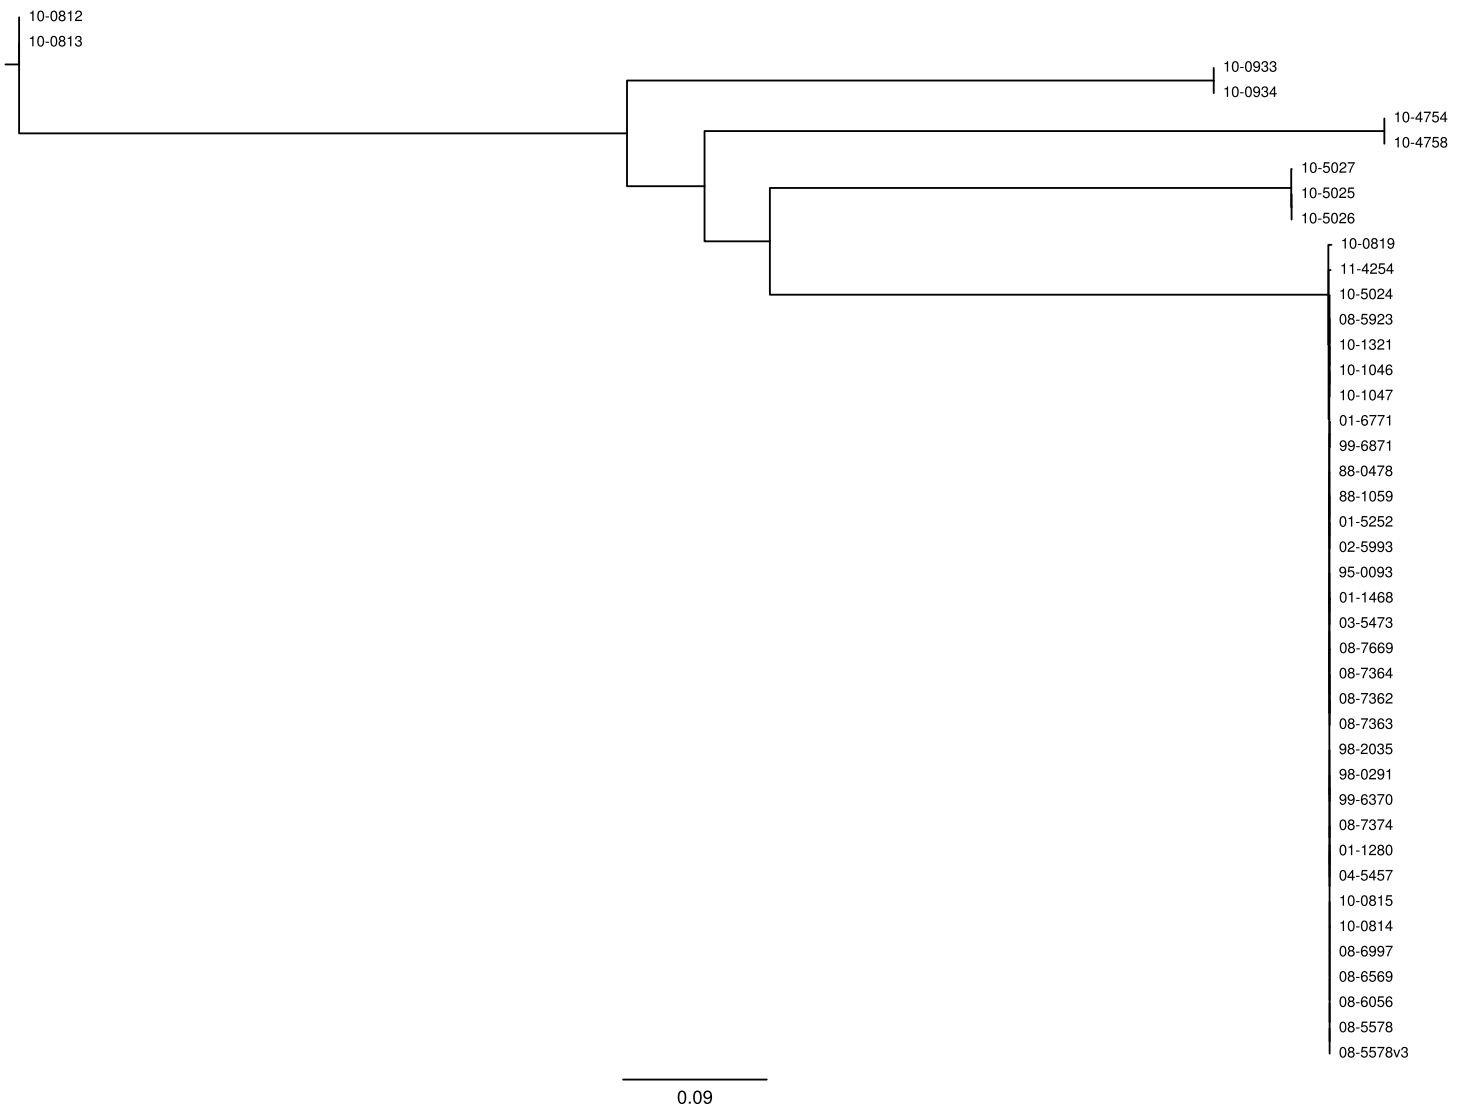

FIGURE S2B

FIGURE S3

A

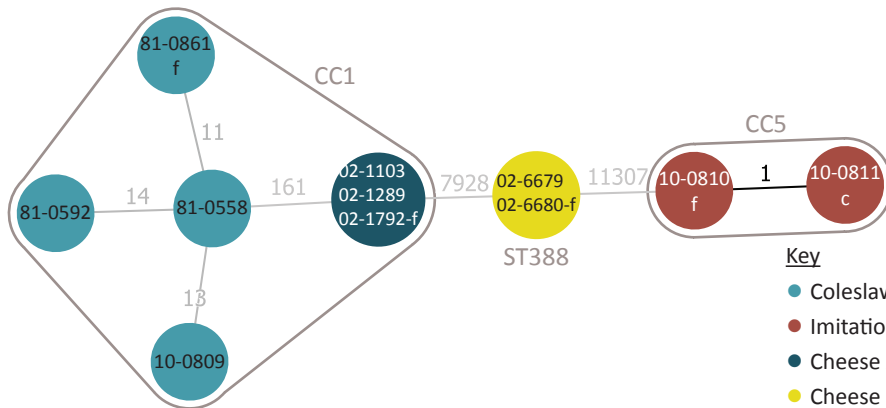

B

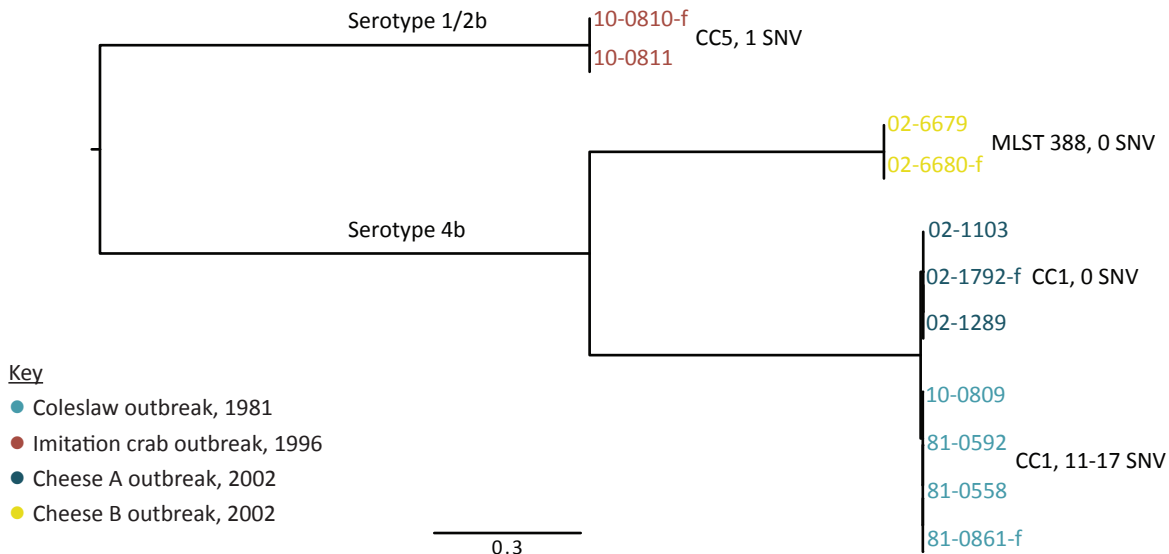

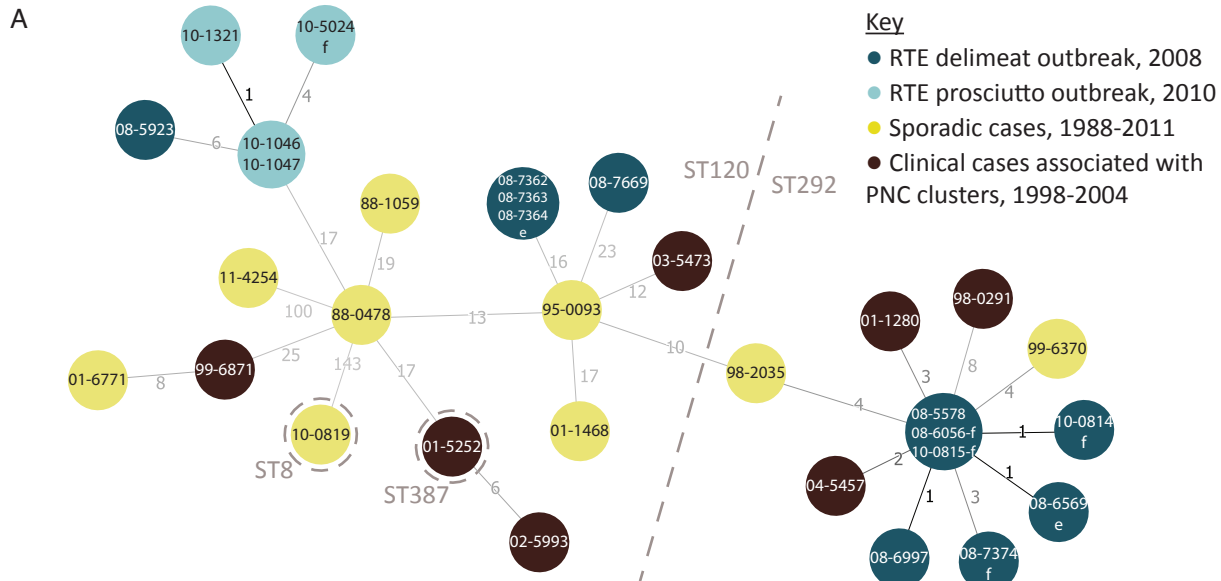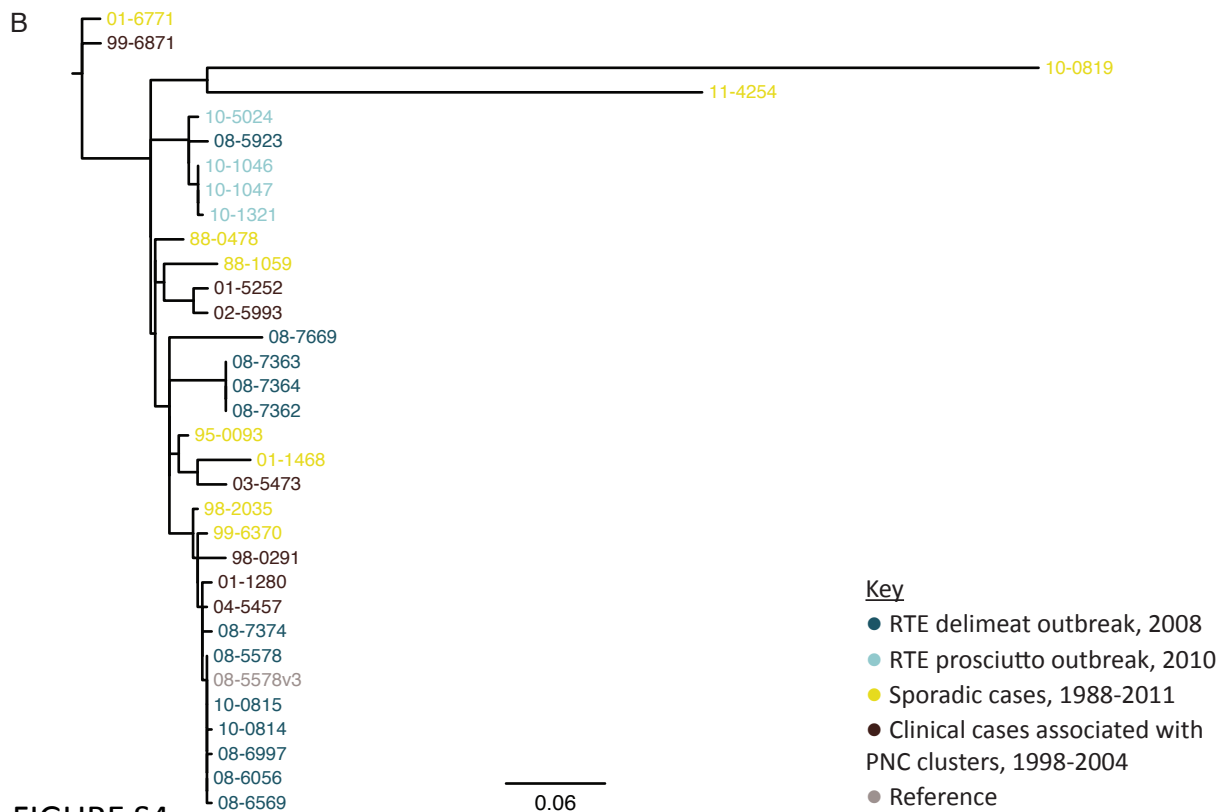

FIGURE S4





FIGURE S6

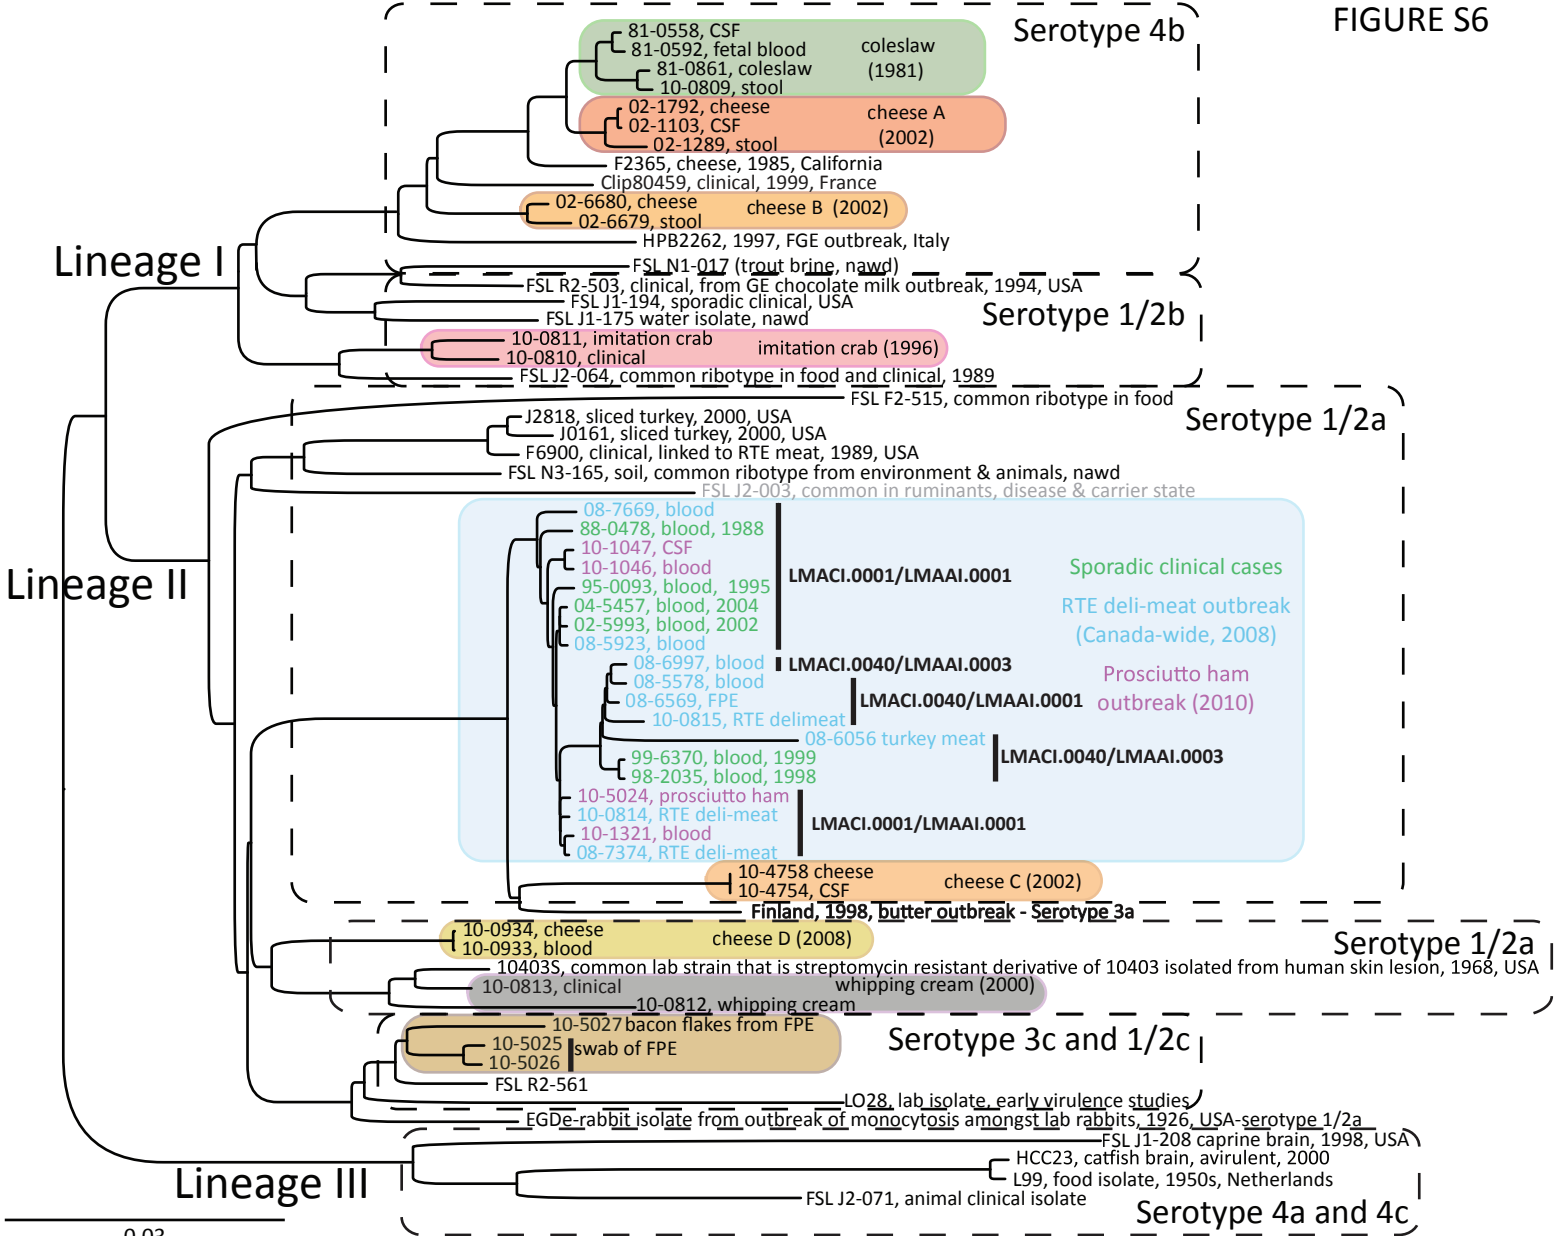

0.03

PFGE-Ascl

PFGE-Ascl

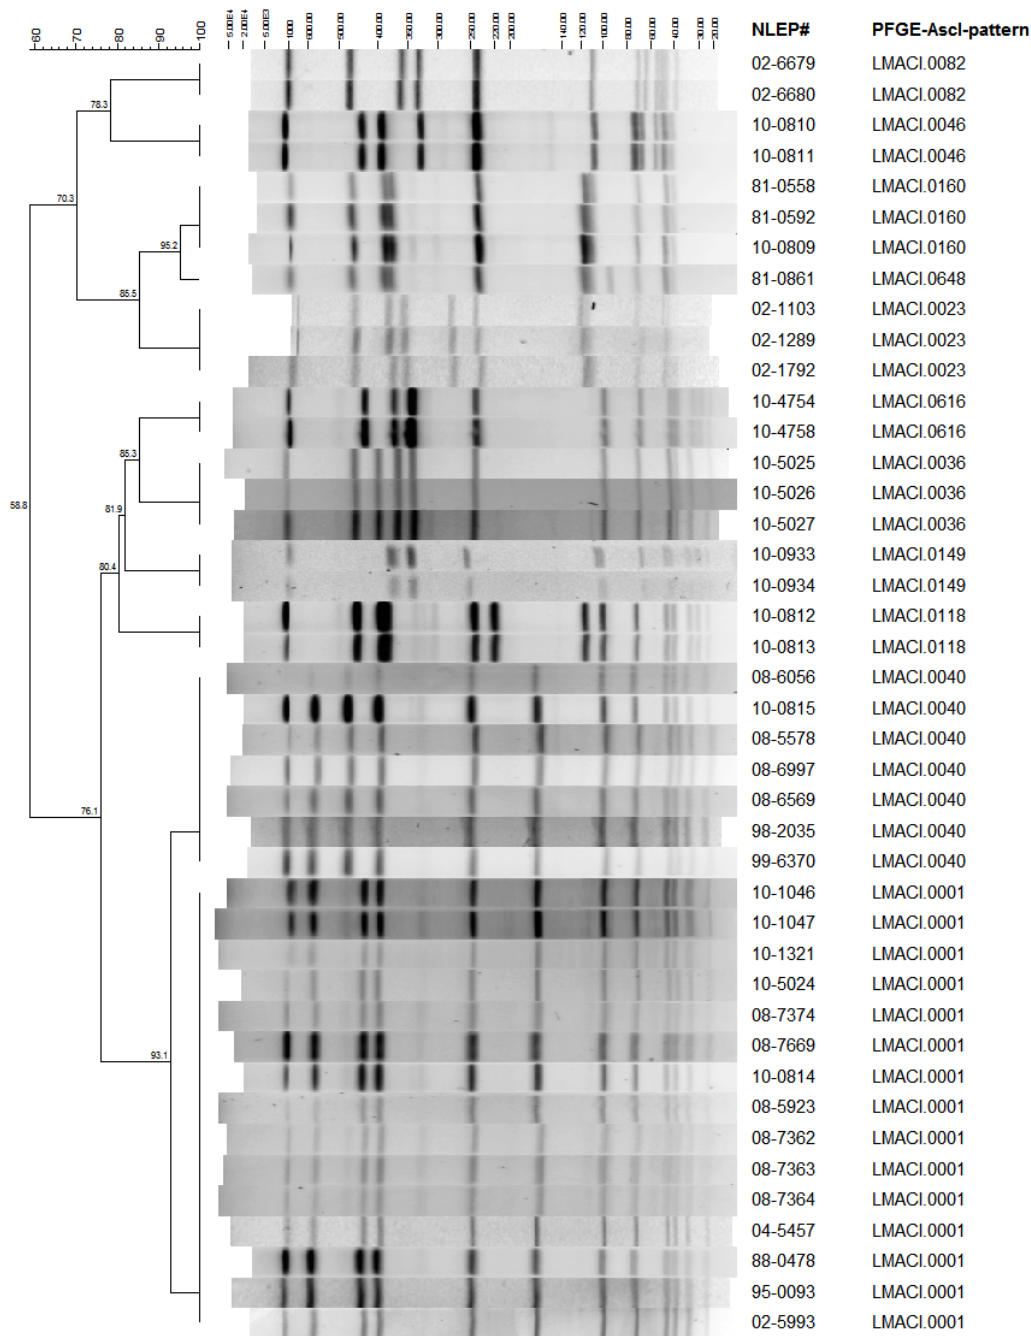

FIGURE S7A

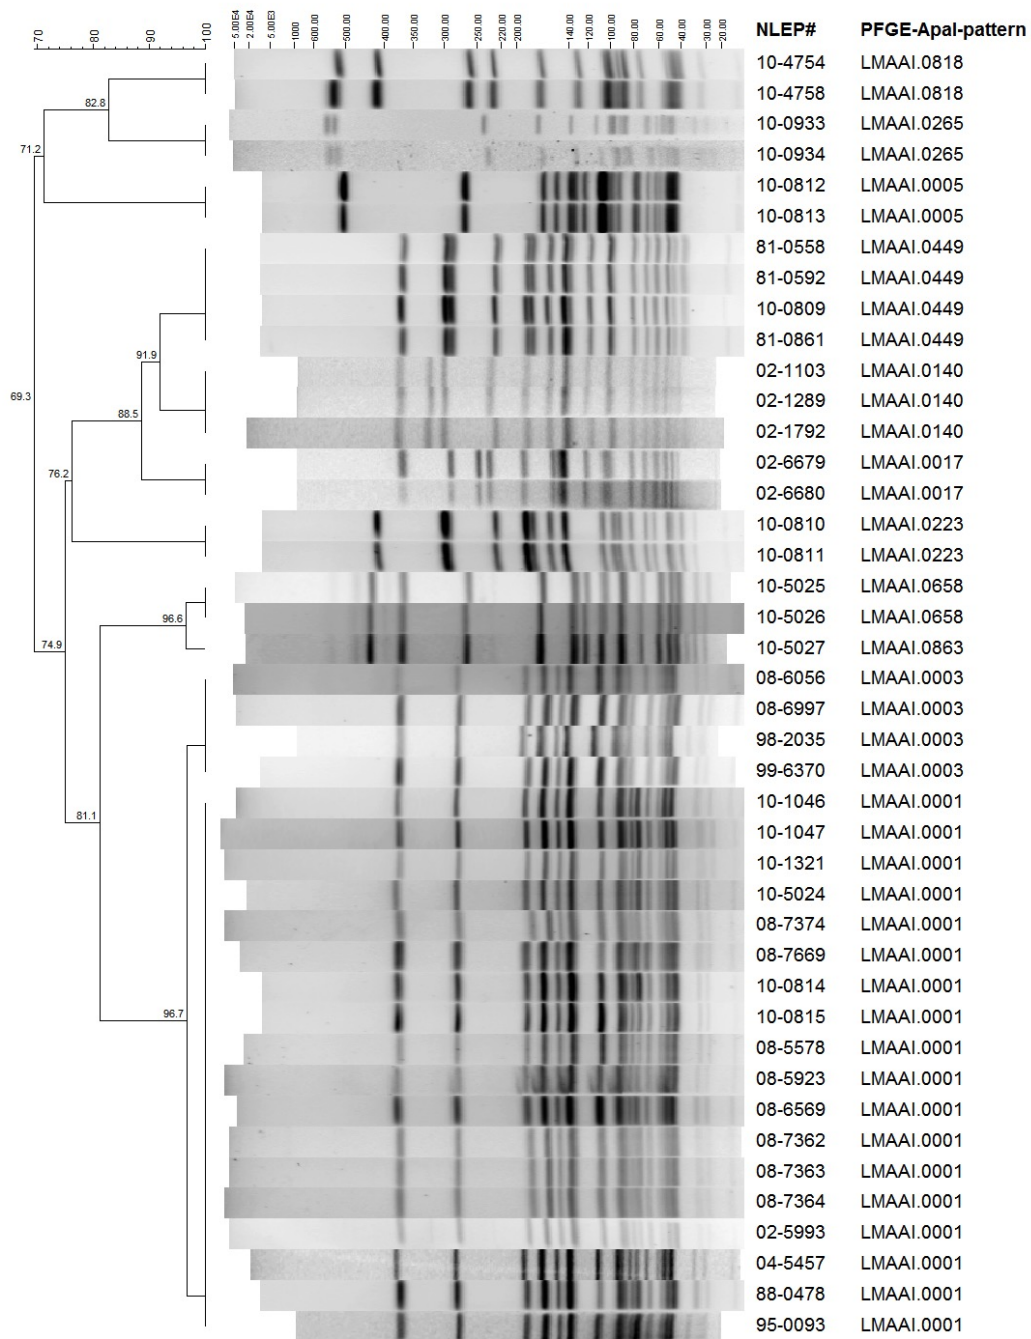

FIGURE S7B

**Table S1. Canadian *Listeria monocytogenes* isolates analyzed in this study**

| Outbreak Investigation                  | Isolate              | Figure 3 designation | Year Isolated | Submitting Province/Region | Specimen Type          | Source                 | Serotype | MLST | Clonal complex | PFGE        |             | Epidemiology                                                                            | Reference                                                                                                                                                                                                                                                | Assembly status                                                                                                                                                                           | Genome Accession      | Bioproject   | BioSample    |              |
|-----------------------------------------|----------------------|----------------------|---------------|----------------------------|------------------------|------------------------|----------|------|----------------|-------------|-------------|-----------------------------------------------------------------------------------------|----------------------------------------------------------------------------------------------------------------------------------------------------------------------------------------------------------------------------------------------------------|-------------------------------------------------------------------------------------------------------------------------------------------------------------------------------------------|-----------------------|--------------|--------------|--------------|
|                                         |                      |                      |               |                            |                        |                        |          |      |                | <i>AscI</i> | <i>Apal</i> |                                                                                         |                                                                                                                                                                                                                                                          |                                                                                                                                                                                           |                       |              |              |              |
| Coleslaw, 1981                          | 81-0861              | NA                   | 1981          | Nova Scotia                | Food                   | Coleslaw               | 4b       | 1    | 1              | LMACI.0648  | LMAAI.0449  |                                                                                         |                                                                                                                                                                                                                                                          | Complete                                                                                                                                                                                  | CP006874              | PRJNA167874  | SAMN05771116 |              |
|                                         | 10-0809              | NA                   | 1981          | Nova Scotia                | Clinical               | Stool                  | 4b       | 1    | 1              | LMACI.0160  | LMAAI.0449  | 41 cases; 17 deaths including 2 adults with meningitis, 4 stillbirths, 5 [19] perinatal |                                                                                                                                                                                                                                                          | Complete                                                                                                                                                                                  | CP007167              | PRJNA167875  | SAMN07124730 |              |
|                                         | 81-0592              | NA                   | 1981          | Nova Scotia                | Clinical               | Fetal blood            | 4b       | 1    | 1              | LMACI.0160  | LMAAI.0449  |                                                                                         |                                                                                                                                                                                                                                                          | Complete                                                                                                                                                                                  | CP007526              | PRJNA167873  | SAMN02713778 |              |
|                                         | 81-0558              | NA                   | 1981          | Nova Scotia                | Clinical               | CSF                    | 4b       | 1    | 1              | LMACI.0160  | LMAAI.0449  |                                                                                         |                                                                                                                                                                                                                                                          | Complete                                                                                                                                                                                  | CP007525              | PRJNA167872  | SAMN02713777 |              |
| Imitation crab, 1996                    | 10-0811              | NA                   | 1996          | Ontario                    | Food                   | Imitation crab         | 1/2b     | 5    | 5              | LMACI.0046  | LMAAI.0223  |                                                                                         | 2 cases; 0 deaths, severe gastroenteritis, 1 septic and hospitalized                                                                                                                                                                                     | Farber JM, Daley EM, MacKie MT, Limerick B: A small outbreak of listeriosis potentially linked to the consumption of imitation crab meat. <i>Lett Appl Microbiol</i> 2000, 31(2):100-104. | Complete              | CP007169     | PRJNA167877  | SAMN07124732 |
|                                         | 10-0810              | NA                   | 1996          | Ontario                    | Clinical               | Stool                  | 1/2b     | 5    | 5              | LMACI.0046  | LMAAI.0223  |                                                                                         |                                                                                                                                                                                                                                                          | Complete                                                                                                                                                                                  | CP007168              | PRJNA167876  | SAMN07124731 |              |
| Whipping cream, 2000                    | 10-0812              | NA                   | 2000          | Manitoba                   | Food                   | Whipping Cream         | 1/2a     | 7    | 7              | LMACI.0118  | LMAAI.0122  | 7 cases: 6 mild, 1 hospitalized and CSF positive                                        | Pagotto F, Ng LK, Clark C, Farber J, Canadian Public Health Laboratory Network: Canadian listeriosis reference service. <i>Foodborne Pathog Dis</i> 2006, 3(1):132-137.                                                                                  | Complete                                                                                                                                                                                  | CP007170              | PRJNA167878  | SAMN07124733 |              |
|                                         | 10-0813              | NA                   | 2000          | Manitoba                   | Clinical               | Blood                  | 1/2a     | 7    | 7              | LMACI.0118  | LMAAI.0122  |                                                                                         |                                                                                                                                                                                                                                                          | Complete                                                                                                                                                                                  | CP007171              | PRJNA167879  | SAMN07124734 |              |
| Cheese C, 2002                          | 10-4758              | NA                   | 2002          | Quebec                     | Food                   | Cheese                 | 1/2a     | 37   | 37             | LMACI.0616  | LMAAI.0818  | 17 cases: 11 hospitalized, 2 perinatal with premature births                            | Gaulin C, Currie A, Gravel G, Hamel M, Leblanc MA, Ramsay D, Bekal S: Summary of 11 years of enteric outbreak investigations and criteria to initiate an investigation, Province of Quebec, 2002 through 2012. <i>J Food Prot</i> 2014, 77(9):1563-1570. | Complete                                                                                                                                                                                  | CP007198              | PRJNA167881  | SAMN07124736 |              |
|                                         | 10-4754              | NA                   | 2002          | Quebec                     | Clinical               | CSF                    | 1/2a     | 37   | 37             | LMACI.0616  | LMAAI.0818  |                                                                                         |                                                                                                                                                                                                                                                          | Complete                                                                                                                                                                                  | CP007197              | PRJNA167880  | SAMN07124735 |              |
| Cheese A, 2002                          | 02-1792              | NA                   | 2002          | British Columbia           | Food                   | Cheese                 | 4b       | 1    | 1              | LMACI.0023  | LMAAI.0140  | 47 cases including: 2 meningitis and 2 perinatal bacteremia                             | [21]                                                                                                                                                                                                                                                     | Complete                                                                                                                                                                                  | CP007461              | PRJNA167886  | SAMN07124741 |              |
|                                         | 02-1289              | NA                   | 2002          | British Columbia           | Clinical               | Stool                  | 4b       | 1    | 1              | LMACI.0023  | LMAAI.0140  |                                                                                         |                                                                                                                                                                                                                                                          |                                                                                                                                                                                           | Complete              | CP007460     | PRJNA167885  | SAMN07124740 |
|                                         | 02-1103              | NA                   | 2002          | British Columbia           | Clinical               | CSF                    | 4b       | 1    | 1              | LMACI.0023  | LMAAI.0140  |                                                                                         |                                                                                                                                                                                                                                                          |                                                                                                                                                                                           | Complete              | CP007459     | PRJNA167884  | SAMN07124739 |
| Cheese B, 2002                          | 02-6680              | NA                   | 2002          | British Columbia           | Food                   | Cheese                 | 4b       | 388  | n/a            | LMACI.0082  | LMAAI.0017  | 86 febrile gastrointestinal cases                                                       | [21]                                                                                                                                                                                                                                                     | Complete                                                                                                                                                                                  | CP007462              | PRJNA167888  | SAMN07124742 |              |
|                                         | 02-6679              | NA                   | 2002          | British Columbia           | Clinical               | Stool                  | 4b       | 388  | n/a            | LMACI.0082  | LMAAI.0017  |                                                                                         |                                                                                                                                                                                                                                                          |                                                                                                                                                                                           | Complete              | CP008821     | PRJNA167887  | SAMN02944848 |
| Cheese D, 2008                          | 10-0934              | NA                   | 2008          | Quebec                     | Food                   | Cheese                 | 1/2a     | 394  | 415            | LMACI.0149  | LMAAI.0265  | 39 cases including: 7 perinatal, 1 adult death, 1 stillborn                             | This study                                                                                                                                                                                                                                               | Complete                                                                                                                                                                                  | CP007200              | PRJNA167883  | SAMN07124738 |              |
|                                         | 10-0933              | NA                   | 2008          | Quebec                     | Clinical               | Blood                  | 1/2a     | 394  | 415            | LMACI.0149  | LMAAI.0265  |                                                                                         |                                                                                                                                                                                                                                                          |                                                                                                                                                                                           | Complete              | CP007199     | PRJNA167882  | SAMN07124737 |
| Ready to eat (RTE) delimeat, 2008       | 08-6569              | 08-E01               | 2008          | Ontario                    | Processing Environment | Food processing        | 1/2a     | 292  | 8              | LMACI.0040  | LMAAI.0001  |                                                                                         |                                                                                                                                                                                                                                                          | Complete                                                                                                                                                                                  | CP006858              | PRJNA167896  | SAMN05771122 |              |
|                                         | 08-7374              | 08-F02               | 2008          | Ontario                    | Food                   | RTE Coorsh smoked meat | 1/2a     | 292  | 8              | LMACI.0001  | LMAAI.0001  |                                                                                         |                                                                                                                                                                                                                                                          | Complete                                                                                                                                                                                  | CP007010              | PRJNA167898  | SAMN07124749 |              |
|                                         | 08-6056              | 08-F01               | 2008          | Ontario                    | Food                   | RTE turkey meat        | 1/2a     | 292  | 8              | LMACI.0040  | LMAAI.0003  |                                                                                         |                                                                                                                                                                                                                                                          | Complete                                                                                                                                                                                  | CP007009              | PRJNA167895  | SAMN07124748 |              |
|                                         | 10-0814              | 08-F04               | 2008          | Ontario                    | Food                   | RTE meat               | 1/2a     | 292  | 8              | LMACI.0001  | LMAAI.0001  |                                                                                         |                                                                                                                                                                                                                                                          | Complete                                                                                                                                                                                  | CP008836              | PRJNA167900  | SAMN02873948 |              |
|                                         | 10-0815              | 08-F05               | 2008          | Saskatchewan               | Food                   | RTE meat               | 1/2a     | 292  | 8              | LMACI.0040  | LMAAI.0001  |                                                                                         |                                                                                                                                                                                                                                                          | Complete                                                                                                                                                                                  | CP006860              | PRJNA167901  | SAMN05771120 |              |
|                                         | 08-5923 <sup>1</sup> | 08-C16               | 2008          | Ontario                    | Clinical               | Blood                  | 1/2a     | 120  | 8              | LMACI.0001  | LMAAI.0001  | 57 cases including 24 listeriosis-confirmed deaths and 0 perinatal deaths               | [8, 10] and this Study                                                                                                                                                                                                                                   | Complete                                                                                                                                                                                  | CP001604              | PRJNA36363   | SAMN02603721 |              |
|                                         | 08-7669 <sup>1</sup> | 08-C18               | 2008          | Saskatchewan               | Clinical               | Blood                  | 1/2a     | 120  | 8              | LMACI.0001  | LMAAI.0001  |                                                                                         |                                                                                                                                                                                                                                                          |                                                                                                                                                                                           | Complete              | CP007011     | PRJNA167899  | SAMN07124750 |
|                                         | 08-5578              | 08-C15               | 2008          | Ontario                    | Clinical               | Blood                  | 1/2a     | 292  | 8              | LMACI.0040  | LMAAI.0001  |                                                                                         |                                                                                                                                                                                                                                                          | Complete                                                                                                                                                                                  | CP001602/<br>CP001603 | PRJNA36361   | SAMN02603776 |              |
|                                         | 08-6997              | 08-C17               | 2008          | Ontario                    | Clinical               | Blood                  | 1/2a     | 292  | 8              | LMACI.0040  | LMAAI.0003  |                                                                                         |                                                                                                                                                                                                                                                          | Complete                                                                                                                                                                                  | CP006859              | PRJNA167897  | SAMN05771121 |              |
|                                         | 08-7362              | 08-E02               | 2008          | Ontario                    | Processing Environment | Unknown                | 1/2a     | 120  | 8              | LMACI.0001  | LMAAI.0001  |                                                                                         |                                                                                                                                                                                                                                                          | Draft                                                                                                                                                                                     | CP008765              | PRJNA215186  | SAMN02725201 |              |
|                                         | 08-7363              | 08-E03               | 2008          | Ontario                    | Processing Environment | Unknown                | 1/2a     | 120  | 8              | LMACI.0001  | LMAAI.0001  |                                                                                         |                                                                                                                                                                                                                                                          | Draft                                                                                                                                                                                     | CP008766              | PRJNA215187  | SAMN02725202 |              |
| 08-7364                                 | 08-E04               | 2008                 | Ontario       | Processing Environment     | Unknown                | 1/2a                   | 120      | 8    | LMACI.0001     | LMAAI.0001  |             |                                                                                         | Draft                                                                                                                                                                                                                                                    | CP008767                                                                                                                                                                                  | PRJNA215188           | SAMN02725203 |              |              |
| Ready to eat (RTE) prosciutto ham, 2010 | 10-5024              | 10-F03               | 2010          | Ontario                    | Clinical               | RTE prosciutto         | 1/2a     | 120  | 8              | LMACI.0001  | LMAAI.0001  |                                                                                         |                                                                                                                                                                                                                                                          | Complete                                                                                                                                                                                  | CP008837              | PRJNA167905  | SAMN02725209 |              |
|                                         | 10-1321              | 10-C24               | 2010          | Ontario                    | Clinical               | Blood                  | 1/2a     | 120  | 8              | LMACI.0001  | LMAAI.0001  | 2 cases, 0 deaths                                                                       | This study                                                                                                                                                                                                                                               | Complete                                                                                                                                                                                  | CP007018              | PRJNA167904  | SAMN07124752 |              |
|                                         | 10-1046 <sup>2</sup> | 10-C22               | 2010          | Ontario                    | Clinical               | Blood                  | 1/2a     | 120  | 8              | LMACI.0001  | LMAAI.0001  |                                                                                         |                                                                                                                                                                                                                                                          |                                                                                                                                                                                           | Complete              | CP007017     | PRJNA167902  | SAMN07124751 |

|                                          |                      |        |      |                  |                        |                                                                                                             |      |     |   |            |            |                               |          |          |             |              |              |
|------------------------------------------|----------------------|--------|------|------------------|------------------------|-------------------------------------------------------------------------------------------------------------|------|-----|---|------------|------------|-------------------------------|----------|----------|-------------|--------------|--------------|
|                                          | 10-1047 <sup>2</sup> | 10-C23 | 2010 | Ontario          | Clinical               | CSF                                                                                                         | 1/2a | 120 | 8 | LMACI.0001 | LMAAL.0001 |                               | Complete | CP006861 | PRJNA167903 | SAMN05771119 |              |
|                                          | 88-0478              | 88-C01 | 1988 | Ontario          | Clinical               | Blood                                                                                                       | 1/2a | 120 | 8 | LMACI.0001 | LMAAL.0001 |                               | Complete | CP006862 | PRJNA167889 | SAMN05771118 |              |
|                                          | 88-1059              | 88-C02 | 1988 | Newfoundland     | Clinical               | Blood                                                                                                       | 3a   | 120 | 8 | LMACI.0001 | LMAAL.0001 |                               | Draft    | CP008770 | PRJNA215191 | SAMN02725206 |              |
|                                          | 95-0093              | 95-C03 | 1995 | Alberta          | Clinical               | Blood                                                                                                       | 1/2a | 120 | 8 | LMACI.0001 | LMAAL.0001 |                               | Complete | CP007019 | PRJNA167890 | SAMN07124743 |              |
|                                          | 98-0291              | 98-C04 | 1998 | Ontario          | Clinical               | Blood                                                                                                       | 1/2a | 120 | 8 | LMACI.0001 | LMAAL.0001 |                               | Draft    | CP008771 | PRJNA215192 | SAMN02725207 |              |
|                                          | 98-2035              | 98-C05 | 1998 | Ontario          | Clinical               | Blood                                                                                                       | 1/2a | 292 | 8 | LMACI.0040 | LMAAL.0003 |                               | Complete | CP007020 | PRJNA167891 | SAMN07124744 |              |
|                                          | 99-6370              | 99-C06 | 1999 | Newfoundland     | Clinical               | Blood                                                                                                       | 1/2a | 292 | 8 | LMACI.0040 | LMAAL.0003 |                               | Complete | CP007021 | PRJNA167892 | SAMN07124745 |              |
|                                          | 99-6871              | 99-C07 | 1999 | Ontario          | Clinical               | Tissue                                                                                                      | 1/2a | 120 | 8 | LMACI.0001 | LMAAL.0001 |                               | Draft    | CP008772 | PRJNA215193 | SAMN02725208 |              |
| Sporadic                                 | 01-1280              | 01-C08 | 2001 | Ontario          | Clinical               | Blood                                                                                                       | 1/2a | 292 | 8 | LMACI.0001 | LMAAL.0001 | Unknown epidemiology          |          | CP006940 | PRJNA215181 | SAMN05771117 |              |
|                                          | 01-1468              | 01-C09 | 2001 | Newfoundland     | Clinical               | Brain tissue                                                                                                | 1/2a | 120 | 8 | LMACI.0098 | LMAAL.0081 |                               | Draft    | CP007527 | PRJNA215182 | SAMN02693102 |              |
|                                          | 01-5252              | 01-C10 | 2001 | Manitoba         | Clinical               | Blood                                                                                                       | 1/2a | 387 | 8 | LMACI.0001 | LMAAL.0003 |                               | Draft    | CP007538 | PRJNA215183 | SAMN02725064 |              |
|                                          | 01-6771              | 01-C11 | 2001 | Ontario          | Clinical               | Vitreous                                                                                                    | 1/2a | 120 | 8 | LMACI.0001 | LMAAL.0142 |                               | Draft    | CP008703 | PRJNA215184 | SAMN02725199 |              |
|                                          | 02-5993              | 02-C12 | 2002 | Ontario          | Clinical               | Blood                                                                                                       | 1/2a | 120 | 8 | LMACI.0001 | LMAAL.0001 |                               | Complete | CP007007 | PRJNA167893 | SAMN07124746 |              |
|                                          | 03-5473              | 03-C13 | 2003 | Ontario          | Clinical               | Blood                                                                                                       | 1/2a | 120 | 8 | LMACI.0001 | LMAAL.0001 |                               | Draft    | CP008773 | PRJNA215185 | SAMN02725200 |              |
|                                          | 04-5457              | 04-C14 | 2004 | Ontario          | Clinical               | Blood                                                                                                       | 1/2a | 292 | 8 | LMACI.0001 | LMAAL.0001 |                               | Complete | CP007008 | PRJNA167894 | SAMN07124747 |              |
|                                          | 10-0819              | 10-C21 | 2010 | Ontario          | Clinical               | Blood                                                                                                       | 1/2a | 8   | 8 | LMACI.0618 | LMAAL.0003 |                               | Draft    | CP008768 | PRJNA215189 | SAMN02725204 |              |
|                                          | 11-4254              | 11-C25 | 2011 | British Columbia | Clinical               | Blood                                                                                                       | 1/2a | 120 | 8 | LMACI.0573 | LMAAL.0214 |                               | Draft    | CP008769 | PRJNA215190 | SAMN02725205 |              |
|                                          | 10-5025              | NA     | 2009 | Ontario          | Food                   | Fully cooked bacon flakes                                                                                   | 1/2c | 9   | 9 | LMACI.0036 | LMAAL.0658 | Same establishment as 10-5025 | Complete | CP007194 |             | PRJNA167906  | SAMN07124753 |
| Non-Outbreak Associated FPE <sup>3</sup> | 10-5026              | NA     | 2009 | Ontario          | Processing environment | Composite swab: dicer exit and blade                                                                        | 1/2c | 9   | 9 | LMACI.0036 | LMAAL.0658 | Same establishment as 10-5026 | Complete | CP007195 |             | PRJNA167907  | SAMN07124754 |
|                                          | 10-5027              | NA     | 2009 | Ontario          | Processing environment | Composite swab: chute, 2 trays, scoop, polybag liner, inside hopper, hopper leveling bar, belt top & bottom | 3c   | 9   | 9 | LMACI.0036 | LMAAL.0863 | Distinct establishment        | Complete | CP007196 |             | PRJNA167908  | SAMN07124755 |

RTE, ready to eat; CSF, cerebrospinal fluid; FPE, Food Processing Equipment; PFGE, pulsed-field gele electrophoresis

Average depth of coverage from 115-1227x completed genomes (n=37) using Roche 454 and Illumina data, and from 46-171x (or >50x) for draft genomes (n=13) using GAIIX data. Genomes for 08-5578 and 08-5923 were published previously [10]

<sup>1</sup>Isolates 08-5923 and 08-7669 originally included in 2008 deli meat outbreak investigation deemed unlikely associated due to conflicting epidemiology and typing analyses [8]

<sup>2</sup>Same patient

<sup>3</sup>Common serotype in FPE but uncommon pathogen

Table S2A. Core hqSNV distance matrix for 39 *Listeria monocytogenes* isolates (2010 dataset)

| Isolate   | 10-0933 | 10-0934 | 81-0592 | 10-0809 | 81-0558 | 81-0861 | 02-1103 | 02-1289 | 02-1792 | 10-5025 | 10-5026 | 10-5027 | 02-6680 | 02-6679 | 10-0812 | 10-0813 | 08-7669 | 08-5923 | 02-5993 | 08-6569 | 08-6997 | 08-7374 | 10-0814 | 04-5457 | 08-5578 | 08-5578v3 | 08-6056 | 10-0815 | 10-1046 | 10-1047 | 10-1321 | 10-5024 | 88-0478 | 98-2035 | 99-6370 | 95-0093 | 10-0810 | 10-0811 | 10-4758 | 10-4754 |        |        |        |        |
|-----------|---------|---------|---------|---------|---------|---------|---------|---------|---------|---------|---------|---------|---------|---------|---------|---------|---------|---------|---------|---------|---------|---------|---------|---------|---------|-----------|---------|---------|---------|---------|---------|---------|---------|---------|---------|---------|---------|---------|---------|---------|--------|--------|--------|--------|
| 10-0933   | 0       | 0       | 109608  | 109609  | 109608  | 109609  | 109601  | 109601  | 109601  | 20278   | 20278   | 20278   | 109660  | 109659  | 20506   | 20505   | 20352   | 20345   | 20343   | 20342   | 20342   | 20342   | 20341   | 20341   | 20341   | 20341     | 20341   | 20341   | 20341   | 20343   | 20341   | 20341   | 20341   | 20341   | 20339   | 109167  | 109170  | 22117   | 22116   |         |        |        |        |        |
| 10-0934   | 0       | 0       | 109608  | 109609  | 109608  | 109609  | 109601  | 109601  | 109601  | 20278   | 20278   | 20278   | 109660  | 109659  | 20506   | 20505   | 20352   | 20345   | 20343   | 20342   | 20342   | 20342   | 20341   | 20341   | 20341   | 20341     | 20341   | 20341   | 20343   | 20341   | 20341   | 20341   | 20341   | 20341   | 20339   | 109167  | 109170  | 22117   | 22116   |         |        |        |        |        |
| 81-0592   | 109608  | 109608  | 0       | 13      | 14      | 18      | 142     | 142     | 142     | 109679  | 109679  | 109679  | 6665    | 6666    | 109190  | 109189  | 108762  | 108756  | 108754  | 108754  | 108754  | 108754  | 108753  | 108753  | 108753  | 108753    | 108753  | 108753  | 108753  | 108753  | 108753  | 108753  | 108753  | 108753  | 108753  | 108753  | 108753  | 108753  | 9295    | 9294    | 108818 | 108817 |        |        |
| 10-0809   | 109609  | 109609  | 13      | 0       | 15      | 21      | 145     | 145     | 145     | 109680  | 109680  | 109680  | 6668    | 6667    | 109191  | 109190  | 108763  | 108757  | 108755  | 108755  | 108755  | 108755  | 108754  | 108754  | 108754  | 108754    | 108754  | 108754  | 108754  | 108754  | 108754  | 108754  | 108754  | 108754  | 108754  | 108754  | 108754  | 108754  | 108754  | 9296    | 9297   | 108819 | 108818 |        |
| 81-0558   | 109608  | 109608  | 14      | 15      | 0       | 20      | 144     | 144     | 144     | 109679  | 109679  | 109679  | 6666    | 6667    | 109190  | 109189  | 108760  | 108754  | 108752  | 108752  | 108752  | 108752  | 108751  | 108751  | 108751  | 108751    | 108751  | 108751  | 108751  | 108751  | 108751  | 108751  | 108751  | 108751  | 108751  | 108751  | 108751  | 108751  | 108751  | 108749  | 9295   | 9296   | 108818 | 108817 |
| 81-0861   | 109609  | 109609  | 18      | 21      | 20      | 0       | 148     | 148     | 148     | 109680  | 109680  | 109680  | 6669    | 6668    | 109191  | 109190  | 108761  | 108755  | 108753  | 108753  | 108753  | 108753  | 108752  | 108752  | 108752  | 108752    | 108752  | 108752  | 108752  | 108752  | 108752  | 108752  | 108752  | 108752  | 108752  | 108752  | 108752  | 108752  | 108752  | 108750  | 9298   | 9299   | 108819 | 108818 |
| 02-1289   | 109601  | 109601  | 142     | 145     | 144     | 148     | 0       | 0       | 0       | 109676  | 109676  | 109676  | 6664    | 6665    | 109186  | 109185  | 108759  | 108753  | 108751  | 108751  | 108751  | 108751  | 108750  | 108750  | 108750  | 108750    | 108750  | 108750  | 108750  | 108750  | 108750  | 108750  | 108750  | 108750  | 108750  | 108750  | 108750  | 108748  | 9297    | 9296    | 108819 | 108818 |        |        |
| 02-1103   | 109601  | 109601  | 142     | 145     | 144     | 148     | 0       | 0       | 0       | 109676  | 109676  | 109676  | 6664    | 6665    | 109186  | 109185  | 108759  | 108753  | 108751  | 108751  | 108751  | 108751  | 108750  | 108750  | 108750  | 108750    | 108750  | 108750  | 108750  | 108750  | 108750  | 108750  | 108750  | 108750  | 108750  | 108750  | 108750  | 108748  | 9297    | 9296    | 108819 | 108818 |        |        |
| 02-1792   | 109601  | 109601  | 142     | 145     | 144     | 148     | 0       | 0       | 0       | 109676  | 109676  | 109676  | 6664    | 6665    | 109186  | 109185  | 108759  | 108753  | 108751  | 108751  | 108751  | 108751  | 108750  | 108750  | 108750  | 108750    | 108750  | 108750  | 108750  | 108750  | 108750  | 108750  | 108750  | 108750  | 108750  | 108750  | 108748  | 9297    | 9296    | 108819  | 108818 |        |        |        |
| 10-5025   | 20278   | 20278   | 109679  | 109680  | 109679  | 109680  | 109676  | 109676  | 109676  | 0       | 0       | 22      | 109772  | 109771  | 21142   | 21141   | 19049   | 19042   | 19040   | 19040   | 19040   | 19040   | 19040   | 19039   | 19039   | 19039     | 19039   | 19039   | 19038   | 19038   | 19040   | 19038   | 19039   | 19039   | 19036   | 109290  | 109293  | 20524   | 20523   |         |        |        |        |        |
| 10-5026   | 20278   | 20278   | 109679  | 109680  | 109679  | 109680  | 109676  | 109676  | 109676  | 0       | 0       | 22      | 109772  | 109771  | 21142   | 21141   | 19049   | 19042   | 19040   | 19040   | 19040   | 19040   | 19040   | 19039   | 19039   | 19039     | 19039   | 19038   | 19038   | 19040   | 19038   | 19039   | 19039   | 19036   | 109290  | 109293  | 20524   | 20523   |         |         |        |        |        |        |
| 10-5027   | 20278   | 20278   | 109679  | 109680  | 109679  | 109680  | 109676  | 109676  | 109676  | 22      | 22      | 0       | 109772  | 109771  | 21144   | 21143   | 19051   | 19044   | 19042   | 19042   | 19042   | 19042   | 19041   | 19041   | 19041   | 19041     | 19041   | 19040   | 19040   | 19040   | 19040   | 19040   | 19041   | 19041   | 19038   | 109290  | 109293  | 20526   | 20525   |         |        |        |        |        |
| 02-6679   | 109659  | 109659  | 6666    | 6667    | 6666    | 6668    | 6665    | 6665    | 6665    | 109771  | 109771  | 109771  | 1       | 0       | 109257  | 109256  | 108794  | 108788  | 108786  | 108786  | 108786  | 108786  | 108786  | 108785  | 108785  | 108785    | 108785  | 108785  | 108785  | 108785  | 108785  | 108785  | 108785  | 108785  | 108785  | 108785  | 108783  | 8962    | 8963    | 108964  | 108963 |        |        |        |
| 02-6680   | 109660  | 109660  | 6665    | 6668    | 6667    | 6669    | 6664    | 6664    | 6664    | 109772  | 109772  | 109772  | 0       | 1       | 109258  | 109257  | 108795  | 108789  | 108787  | 108787  | 108787  | 108787  | 108786  | 108786  | 108786  | 108786    | 108786  | 108786  | 108786  | 108786  | 108786  | 108786  | 108786  | 108786  | 108786  | 108786  | 108784  | 8963    | 8962    | 108965  | 108964 |        |        |        |
| 10-0812   | 20506   | 20506   | 109190  | 109191  | 109190  | 109191  | 109186  | 109186  | 109186  | 21142   | 21142   | 21142   | 109258  | 109257  | 0       | 1       | 21377   | 21370   | 21368   | 21367   | 21367   | 21367   | 21366   | 21366   | 21366   | 21366     | 21366   | 21366   | 21366   | 21366   | 21366   | 21366   | 21366   | 21366   | 21366   | 21366   | 108660  | 108663  | 22003   | 22002   |        |        |        |        |
| 10-0813   | 20505   | 20505   | 109189  | 109190  | 109189  | 109190  | 109185  | 109185  | 109185  | 21141   | 21141   | 21141   | 109257  | 109256  | 1       | 0       | 21376   | 21369   | 21367   | 21367   | 21367   | 21367   | 21366   | 21366   | 21366   | 21366     | 21366   | 21366   | 21366   | 21366   | 21366   | 21366   | 21366   | 21366   | 21366   | 108659  | 108662  | 22002   | 22001   |         |        |        |        |        |
| 08-7669   | 20352   | 20352   | 108762  | 108763  | 108760  | 108761  | 108759  | 108759  | 108759  | 19049   | 19049   | 19049   | 19051   | 108795  | 108794  | 21377   | 21376   | 0       | 27      | 25      | 23      | 23      | 23      | 23      | 22      | 22        | 22      | 22      | 22      | 22      | 22      | 22      | 22      | 22      | 22      | 19      | 108314  | 108317  | 20988   | 20987   |        |        |        |        |
| 08-5923   | 20345   | 20345   | 108756  | 108757  | 108754  | 108755  | 108753  | 108753  | 108753  | 19042   | 19042   | 19044   | 108789  | 108788  | 21370   | 21369   | 27      | 0       | 18      | 18      | 18      | 18      | 18      | 17      | 17      | 17        | 17      | 17      | 17      | 17      | 17      | 17      | 17      | 17      | 17      | 14      | 108308  | 108311  | 20981   | 20980   |        |        |        |        |
| 02-5993   | 20343   | 20343   | 108754  | 108755  | 108752  | 108753  | 108751  | 108751  | 108751  | 19040   | 19040   | 19042   | 108787  | 108786  | 21368   | 21367   | 25      | 18      | 0       | 16      | 16      | 16      | 15      | 15      | 15      | 15        | 15      | 14      | 14      | 14      | 16      | 14      | 15      | 15      | 12      | 108306  | 108309  | 20979   | 20978   |         |        |        |        |        |
| 08-6569   | 20342   | 20342   | 108754  | 108755  | 108752  | 108753  | 108751  | 108751  | 108751  | 19040   | 19040   | 19042   | 108787  | 108786  | 21367   | 21366   | 23      | 18      | 0       | 16      | 16      | 16      | 15      | 15      | 1       | 1         | 1       | 1       | 14      | 14      | 14      | 16      | 14      | 3       | 3       | 10      | 108306  | 108309  | 20979   | 20978   |        |        |        |        |
| 08-6997   | 20342   | 20342   | 108754  | 108755  | 108752  | 108753  | 108751  | 108751  | 108751  | 19040   | 19040   | 19042   | 108787  | 108786  | 21367   | 21366   | 23      | 18      | 0       | 16      | 16      | 16      | 15      | 15      | 1       | 1         | 1       | 1       | 14      | 14      | 14      | 16      | 14      | 3       | 3       | 10      | 108306  | 108309  | 20979   | 20978   |        |        |        |        |
| 08-7374   | 20342   | 20342   | 108754  | 108755  | 108752  | 108753  | 108751  | 108751  | 108751  | 19040   | 19040   | 19042   | 108787  | 108786  | 21367   | 21366   | 23      | 18      | 0       | 16      | 16      | 16      | 15      | 15      | 3       | 3         | 3       | 3       | 14      | 14      | 14      | 16      | 14      | 3       | 3       | 10      | 108306  | 108309  | 20979   | 20978   |        |        |        |        |
| 10-0814   | 20342   | 20342   | 108754  | 108755  | 108752  | 108753  | 108751  | 108751  | 108751  | 19040   | 19040   | 19042   | 108787  | 108786  | 21367   | 21366   | 23      | 18      | 0       | 16      | 16      | 16      | 15      | 15      | 3       | 3         | 3       | 3       | 14      | 14      | 14      | 16      | 14      | 3       | 3       | 10      | 108306  | 108309  | 20979   | 20978   |        |        |        |        |
| 10-1046   | 20341   | 20341   | 108753  | 108754  | 108751  | 108752  | 108750  | 108750  | 108750  | 19038   | 19038   | 19040   | 108786  | 108785  | 21366   | 21365   | 23      | 4       | 14      | 14      | 14      | 14      | 14      | 13      | 13      | 13        | 13      | 0       | 0       | 2       | 12      | 13      | 13      | 10      | 108305  | 108308  | 20977   | 20976   |         |         |        |        |        |        |
| 10-1047   | 20341   | 20341   | 108753  | 108754  | 108751  | 108752  | 108750  | 108750  | 108750  | 19038   | 19038   | 19040   | 108786  | 108785  | 21366   | 21365   | 23      | 4       | 14      | 14      | 14      | 14      | 14      | 13      | 13      | 13        | 13      | 0       | 0       | 2       | 12      | 13      | 13      | 10      | 108305  | 108308  | 20977   | 20976   |         |         |        |        |        |        |
| 10-1321   | 20341   | 20341   | 108753  | 108754  | 108751  | 108752  | 108750  | 108750  | 108750  | 19038   | 19038   | 19040   | 108786  | 108785  | 21366   | 21365   | 23      | 4       | 14      | 14      | 14      | 14      | 14      | 13      | 13      | 13        | 0       | 0       | 2       | 12      | 13      | 13      | 10      | 108305  | 108308  | 20977   | 20976   |         |         |         |        |        |        |        |
| 04-5457   | 20341   | 20341   | 108753  | 108754  | 108751  | 108752  | 108750  | 108750  | 108750  | 19039   | 19039   | 19041   | 108786  | 108785  | 21366   | 21365   | 22      | 17      | 15      | 3       | 3       | 3       | 3       | 0       | 2       | 2         | 2       | 13      | 13      | 13      | 15      | 13      | 2       | 2       | 9       | 108305  | 108308  | 20978   | 20977   |         |        |        |        |        |
| 08-5578   | 20341   | 20341   | 108753  | 108754  | 108751  | 108752  | 108750  | 108750  | 108750  | 19039   | 19039   | 19041   | 108786  | 108785  | 21366   | 21365   | 22      | 17      | 15      | 1       | 1       | 3       | 1       | 2       | 0       | 0         | 0       | 13      | 13      | 13      | 15      | 13      | 2       | 2       | 9       | 108305  | 108308  | 20978   | 20977   |         |        |        |        |        |
| 08-5578v3 | 20341   | 20341   | 108753  | 108754  | 108751  | 108752  | 108750  | 108750  | 108750  | 19039   | 19039   | 19041   | 108786  | 108785  | 21366   | 21365   | 22      | 17      | 15      | 1       | 1       | 3       | 1       | 2       | 0       | 0         | 0       | 13      | 13      | 13      | 15      | 13      | 2       | 2       | 9       | 108305  | 108308  | 20978   | 20977   |         |        |        |        |        |
| 08-6056   | 20341   | 20341   | 108753  | 108754  | 108751  | 108752  | 108750  | 108750  | 108750  | 19039   | 19039   | 19041   | 108786  | 108785  | 21366   | 21365   | 22      | 17      | 15      |         |         |         |         |         |         |           |         |         |         |         |         |         |         |         |         |         |         |         |         |         |        |        |        |        |

Table S2B. Core hqSNV distance matrix for 39 *Listeria monocytogenes* isolates (2014 dataset)

| Isolate | 10-0933 | 10-0934 | 81-0592 | 10-0809 | 81-0558 | 81-0861 | 02-1289 | 02-1103 | 02-1792 | 10-5025 | 10-5026 | 10-5027 | 02-6679 | 02-6680 | 10-0812 | 10-0813 | 08-7669 | 08-5923 | 02-5993 | 08-6569 | 08-6997 | 08-7374 | 10-0814 | 10-1046 | 10-1047 | 10-1221 | 04-5457 | 08-5578 | 08-5378v3 | 08-6036 | 10-0815 | 10-5024 | 08-0478 | 98-2035 | 99-6370 | 95-0093 | 10-0810 | 10-0811 | 10-0738 | 10-4754 |        |        |        |        |
|---------|---------|---------|---------|---------|---------|---------|---------|---------|---------|---------|---------|---------|---------|---------|---------|---------|---------|---------|---------|---------|---------|---------|---------|---------|---------|---------|---------|---------|-----------|---------|---------|---------|---------|---------|---------|---------|---------|---------|---------|---------|--------|--------|--------|--------|
| 10-0933 | 0       | 0       | 115441  | 115440  | 115440  | 115438  | 115431  | 115430  | 115430  | 21096   | 21096   | 21095   | 115397  | 115396  | 21294   | 21293   | 21594   | 21588   | 21586   | 21585   | 21585   | 21585   | 21585   | 21585   | 21585   | 21585   | 21584   | 21584   | 21584     | 21584   | 21584   | 21584   | 21584   | 21584   | 21584   | 21584   | 21584   | 21582   | 114343  | 114342  | 23243  | 23242  |        |        |
| 10-0934 | 0       | 0       | 115441  | 115440  | 115440  | 115438  | 115431  | 115430  | 115430  | 21096   | 21096   | 21095   | 115397  | 115396  | 21294   | 21293   | 21594   | 21588   | 21586   | 21585   | 21585   | 21585   | 21585   | 21585   | 21585   | 21585   | 21584   | 21584   | 21584     | 21584   | 21584   | 21584   | 21584   | 21584   | 21584   | 21584   | 21584   | 21584   | 21582   | 114343  | 114342 | 23243  | 23242  |        |
| 81-0592 | 115441  | 115441  | 0       | 15      | 13      | 17      | 147     | 148     | 148     | 115400  | 115400  | 115399  | 6862    | 6863    | 114888  | 114887  | 114466  | 114461  | 114459  | 114459  | 114459  | 114459  | 114459  | 114459  | 114459  | 114459  | 114458  | 114458  | 114458    | 114458  | 114458  | 114458  | 114458  | 114458  | 114458  | 114458  | 114458  | 114458  | 114458  | 114456  | 10103  | 10104  | 114343 | 114342 |
| 10-0809 | 115440  | 115440  | 15      | 0       | 12      | 18      | 148     | 149     | 149     | 115399  | 115399  | 115398  | 6861    | 6860    | 114885  | 114884  | 114465  | 114460  | 114458  | 114458  | 114458  | 114458  | 114458  | 114458  | 114458  | 114458  | 114457  | 114457  | 114457    | 114457  | 114457  | 114457  | 114457  | 114457  | 114457  | 114457  | 114457  | 114457  | 114455  | 10100   | 10103  | 114342 | 114341 |        |
| 81-0558 | 115440  | 115440  | 13      | 12      | 0       | 14      | 146     | 147     | 147     | 115399  | 115399  | 115398  | 6859    | 6860    | 114885  | 114884  | 114465  | 114460  | 114458  | 114458  | 114458  | 114458  | 114458  | 114458  | 114458  | 114458  | 114457  | 114457  | 114457    | 114457  | 114457  | 114457  | 114457  | 114457  | 114457  | 114457  | 114457  | 114455  | 10100   | 10101   | 114342 | 114341 |        |        |
| 81-0861 | 115438  | 115438  | 17      | 18      | 14      | 0       | 150     | 149     | 149     | 115397  | 115397  | 115396  | 6863    | 6864    | 114883  | 114882  | 114463  | 114458  | 114456  | 114456  | 114456  | 114456  | 114456  | 114456  | 114456  | 114456  | 114455  | 114455  | 114455    | 114455  | 114455  | 114455  | 114455  | 114455  | 114455  | 114455  | 114455  | 114455  | 114455  | 114453  | 10104  | 10101  | 114340 | 114339 |
| 02-1289 | 115431  | 115431  | 147     | 148     | 146     | 150     | 0       | 1       | 3       | 115394  | 115394  | 115393  | 6858    | 6859    | 114879  | 114878  | 114462  | 114457  | 114455  | 114455  | 114455  | 114455  | 114455  | 114455  | 114455  | 114454  | 114454  | 114454  | 114454    | 114454  | 114454  | 114454  | 114454  | 114454  | 114454  | 114454  | 114452  | 10100   | 10101   | 114339  | 114338 |        |        |        |
| 02-1103 | 115430  | 115430  | 148     | 149     | 149     | 149     | 1       | 0       | 2       | 115393  | 115393  | 115392  | 6859    | 6860    | 114878  | 114877  | 114461  | 114456  | 114454  | 114454  | 114454  | 114454  | 114454  | 114454  | 114454  | 114454  | 114453  | 114453  | 114453    | 114453  | 114453  | 114453  | 114453  | 114453  | 114453  | 114453  | 114451  | 10101   | 10102   | 114338  | 114337 |        |        |        |
| 02-1792 | 115430  | 115430  | 148     | 149     | 147     | 149     | 3       | 2       | 0       | 115393  | 115393  | 115392  | 6859    | 6860    | 114878  | 114877  | 114461  | 114456  | 114454  | 114454  | 114454  | 114454  | 114454  | 114454  | 114454  | 114453  | 114453  | 114453  | 114453    | 114453  | 114453  | 114453  | 114453  | 114453  | 114453  | 114451  | 10101   | 10102   | 114338  | 114337  |        |        |        |        |
| 10-5025 | 21096   | 21096   | 115400  | 115399  | 115399  | 115397  | 115394  | 115393  | 115393  | 0       | 0       | 23      | 115386  | 115385  | 21845   | 21844   | 20046   | 20040   | 20038   | 20038   | 20038   | 20038   | 20038   | 20038   | 20037   | 20037   | 20037   | 20037   | 20037     | 20037   | 20037   | 20037   | 20037   | 20037   | 20037   | 20037   | 20036   | 20037   | 20037   | 20034   | 114414 | 114413 | 21490  | 21489  |
| 10-5026 | 21096   | 21096   | 115400  | 115399  | 115399  | 115397  | 115394  | 115393  | 115393  | 0       | 0       | 23      | 115386  | 115385  | 21845   | 21844   | 20046   | 20040   | 20038   | 20038   | 20038   | 20038   | 20038   | 20037   | 20037   | 20037   | 20037   | 20037   | 20037     | 20037   | 20037   | 20037   | 20037   | 20037   | 20036   | 20037   | 20037   | 20037   | 20034   | 114414  | 114413 | 21490  | 21489  |        |
| 10-5027 | 21095   | 21095   | 115399  | 115398  | 115398  | 115396  | 115393  | 115392  | 115392  | 23      | 0       | 115385  | 115384  | 21846   | 21845   | 20047   | 20041   | 20039   | 20039   | 20039   | 20039   | 20039   | 20039   | 20038   | 20038   | 20038   | 20038   | 20038   | 20038     | 20038   | 20038   | 20038   | 20038   | 20038   | 20038   | 20038   | 20035   | 114413  | 114412  | 21491   | 21490  |        |        |        |
| 02-6679 | 115397  | 115397  | 6862    | 6861    | 6859    | 6863    | 6858    | 6859    | 6859    | 115386  | 115386  | 115385  | 0       | 1       | 114845  | 114844  | 114395  | 114390  | 114388  | 114388  | 114388  | 114388  | 114388  | 114388  | 114388  | 114388  | 114387  | 114387  | 114387    | 114387  | 114387  | 114387  | 114387  | 114387  | 114387  | 114387  | 114387  | 114385  | 9769    | 9770    | 114372 | 114371 |        |        |
| 02-6680 | 115396  | 115396  | 6863    | 6860    | 6860    | 6864    | 6859    | 6860    | 6860    | 115385  | 115385  | 115384  | 1       | 0       | 114844  | 114843  | 114394  | 114389  | 114387  | 114387  | 114387  | 114387  | 114387  | 114387  | 114387  | 114387  | 114387  | 114386  | 114386    | 114386  | 114386  | 114386  | 114386  | 114386  | 114386  | 114386  | 114386  | 114384  | 9768    | 9771    | 114371 | 114370 |        |        |
| 10-0812 | 21294   | 21294   | 114888  | 114885  | 114885  | 114883  | 114879  | 114878  | 114878  | 21845   | 21845   | 21846   | 114845  | 114844  | 0       | 1       | 22450   | 22444   | 22442   | 22441   | 22441   | 22441   | 22441   | 22441   | 22441   | 22441   | 22441   | 22440   | 22440     | 22440   | 22440   | 22440   | 22440   | 22440   | 22440   | 22440   | 22436   | 113760  | 113759  | 22959   | 22958  |        |        |        |
| 10-0813 | 21293   | 21293   | 114887  | 114884  | 114884  | 114882  | 114878  | 114877  | 114877  | 21844   | 21844   | 21845   | 114844  | 114843  | 1       | 0       | 22449   | 22443   | 22441   | 22440   | 22440   | 22440   | 22440   | 22440   | 22440   | 22440   | 22440   | 22439   | 22439     | 22439   | 22439   | 22439   | 22439   | 22439   | 22439   | 22439   | 22435   | 113759  | 113758  | 22958   | 22957  |        |        |        |
| 08-7669 | 21594   | 21594   | 114466  | 114465  | 114465  | 114463  | 114462  | 114461  | 114461  | 20046   | 20046   | 20047   | 114395  | 114394  | 22450   | 22449   | 0       | 28      | 24      | 22      | 22      | 22      | 22      | 22      | 25      | 25      | 25      | 21      | 21        | 21      | 21      | 21      | 21      | 21      | 21      | 21      | 18      | 113416  | 113415  | 22107   | 22106  |        |        |        |
| 08-5923 | 21588   | 21588   | 114461  | 114460  | 114460  | 114458  | 114457  | 114456  | 114456  | 20040   | 20040   | 20041   | 114390  | 114389  | 22444   | 22443   | 28      | 0       | 20      | 20      | 20      | 20      | 20      | 5       | 5       | 5       | 19      | 19      | 19        | 19      | 19      | 19      | 19      | 19      | 19      | 19      | 16      | 113411  | 113410  | 22101   | 22100  |        |        |        |
| 02-5993 | 21586   | 21586   | 114459  | 114458  | 114458  | 114456  | 114455  | 114454  | 114454  | 20038   | 20038   | 20039   | 114388  | 114387  | 22442   | 22441   | 24      | 0       | 16      | 16      | 16      | 16      | 17      | 17      | 17      | 15      | 15      | 15      | 15        | 15      | 15      | 15      | 15      | 15      | 15      | 15      | 15      | 12      | 113409  | 113408  | 22099  | 22098  |        |        |
| 08-6569 | 21585   | 21585   | 114459  | 114458  | 114458  | 114456  | 114455  | 114454  | 114454  | 20038   | 20038   | 20039   | 114388  | 114387  | 22441   | 22440   | 22      | 0       | 16      | 16      | 16      | 16      | 17      | 17      | 17      | 17      | 17      | 17      | 17        | 17      | 17      | 17      | 17      | 17      | 17      | 17      | 17      | 17      | 17      | 17      | 17     | 17     | 17     | 17     |
| 08-6997 | 21585   | 21585   | 114459  | 114458  | 114458  | 114456  | 114455  | 114454  | 114454  | 20038   | 20038   | 20039   | 114388  | 114387  | 22441   | 22440   | 22      | 0       | 16      | 16      | 16      | 16      | 17      | 17      | 17      | 17      | 17      | 17      | 17        | 17      | 17      | 17      | 17      | 17      | 17      | 17      | 17      | 17      | 17      | 17      | 17     | 17     | 17     |        |
| 08-7374 | 21585   | 21585   | 114459  | 114458  | 114458  | 114456  | 114455  | 114454  | 114454  | 20038   | 20038   | 20039   | 114388  | 114387  | 22441   | 22440   | 22      | 0       | 16      | 16      | 16      | 16      | 17      | 17      | 17      | 17      | 17      | 17      | 17        | 17      | 17      | 17      | 17      | 17      | 17      | 17      | 17      | 17      | 17      | 17      | 17     | 17     | 17     |        |
| 10-0814 | 21585   | 21585   | 114459  | 114458  | 114458  | 114456  | 114455  | 114454  | 114454  | 20038   | 20038   | 20039   | 114388  | 114387  | 22441   | 22440   | 22      | 0       | 16      | 16      | 16      | 16      | 17      | 17      | 17      | 17      | 17      | 17      | 17        | 17      | 17      | 17      | 17      | 17      | 17      | 17      | 17      | 17      | 17      | 17      | 17     | 17     | 17     |        |
| 10-1046 | 21585   | 21585   | 114459  | 114458  | 114458  | 114456  | 114455  | 114454  | 114454  | 20038   | 20038   | 20039   | 114388  | 114387  | 22441   | 22440   | 25      | 5       | 17      | 17      | 17      | 17      | 17      | 17      | 17      | 17      | 17      | 17      | 17        | 17      | 17      | 17      | 17      | 17      | 17      | 17      | 17      | 17      | 17      | 17      | 17     | 17     | 17     |        |
| 10-1047 | 21585   | 21585   | 114459  | 114458  | 114458  | 114456  | 114455  | 114454  | 114454  | 20037   | 20037   | 20038   | 114388  | 114387  | 22441   | 22440   | 25      | 5       | 17      | 17      | 17      | 17      | 17      | 17      | 17      | 17      | 17      | 17      | 17        | 17      | 17      | 17      | 17      | 17      | 17      | 17      | 17      | 17      | 17      | 17      | 17     | 17     | 17     |        |
| 10-1046 | 21585   | 21585   | 114459  | 114458  | 114458  | 114456  | 114455  | 114454  | 114454  | 20037   | 20037   | 20038   | 114388  | 114387  | 22441   | 22440   | 25      | 5       | 17      | 17      | 17      | 17      | 17      | 17      | 17      | 17      | 17      | 17      | 17        | 17      | 17      | 17      | 17      | 17      | 17      | 17      | 17      | 17      | 17      | 17      | 17     | 17     | 17     |        |
| 10-1321 | 21585   | 21585   | 114459  | 114458  | 114458  | 114456  | 114455  | 114454  | 114454  | 20037   | 20037   | 20038   | 114388  | 114387  | 22441   | 22440   | 25      | 5       | 17      | 17      | 17      | 17      | 17      | 17      | 17      | 17      | 17      | 17      | 17        | 17      | 17      | 17      | 17      | 17      | 17      | 17      | 17      | 17      | 17      | 17      | 17     | 17     | 17     |        |
| 04-5457 | 21584   | 21584   | 114458  | 114457  | 114457  | 114455  | 114454  | 114453  | 114453  | 20037   | 20037   | 20038   | 114387  | 114386  | 22440   | 22439   | 21      | 19      | 15      | 3       | 3       | 3       | 3       | 3       | 16      | 16      | 16      | 16      | 16        | 16      | 16      | 16      | 16      | 16      | 16      | 16      | 16      | 16      | 16      | 16      | 16     | 16     | 16     |        |
| 08-5578 | 21584   | 21584   | 114458  | 114457  | 114457  | 114455  | 114454  | 114453  | 114453  | 20037</ |         |         |         |         |         |         |         |         |         |         |         |         |         |         |         |         |         |         |           |         |         |         |         |         |         |         |         |         |         |         |        |        |        |        |





**Table S4. Lineage I core hqSNV distance matrix**

| Clonal Complex | Outbreak Investigation | Isolate        | 10-0810 | 10-0811 | 02-6679 | 02-6680 | 02-1103 | 02-1289 | 02-1792 | 81-0592 | 10-0809 | 81-0861 | 81-0558 | # Isolate Type |
|----------------|------------------------|----------------|---------|---------|---------|---------|---------|---------|---------|---------|---------|---------|---------|----------------|
|                |                        |                | C       | F       | F       | C       | C       | C       | F       | C       | C       | F       | C       |                |
| 5              |                        | <b>10-0810</b> | 0       | 1       | 11307   | 11307   | 11443   | 11443   | 11443   | 11450   | 11449   | 11449   | 11446   |                |
| 5              |                        | <b>10-0811</b> | 1       | 0       | 11308   | 11308   | 11444   | 11444   | 11444   | 11451   | 11450   | 11450   | 11447   |                |
| n/a            | 2002 Cheese B          | <b>02-6679</b> | 11307   | 11308   | 0       | 0       | 7928    | 7928    | 7928    | 7934    | 7933    | 7933    | 7930    |                |
| n/a            |                        | <b>02-6680</b> | 11307   | 11308   | 0       | 0       | 7928    | 7928    | 7928    | 7934    | 7933    | 7933    | 7930    |                |
|                | 2002 Cheese A          | <b>02-1103</b> | 11443   | 11444   | 7928    | 7928    | 0       | 0       | 0       | 165     | 164     | 164     | 161     |                |
|                |                        | <b>02-1289</b> | 11443   | 11444   | 7928    | 7928    | 0       | 0       | 0       | 165     | 164     | 164     | 161     |                |
|                |                        | <b>02-1792</b> | 11443   | 11444   | 7928    | 7928    | 0       | 0       | 0       | 165     | 164     | 164     | 161     |                |
| 1              | 1981 Coleslaw          | <b>81-0592</b> | 11450   | 11451   | 7934    | 7934    | 165     | 165     | 165     | 0       | 17      | 17      | 14      |                |
|                |                        | <b>10-0809</b> | 11449   | 11450   | 7933    | 7933    | 164     | 164     | 164     | 17      | 0       | 16      | 13      |                |
|                |                        | <b>81-0861</b> | 11449   | 11450   | 7933    | 7933    | 164     | 164     | 164     | 17      | 16      | 0       | 11      |                |
|                |                        | <b>81-0558</b> | 11446   | 11447   | 7930    | 7930    | 161     | 161     | 161     | 14      | 13      | 11      | 0       |                |

# Isolate types: C, Clinical; F, Food; FPE, Food processing environment.

Note: Outbreak isolates without epidemiological links to outbreak were omitted from pairwise analysis (Figure 2). Epidemiologically-related pairs (green); pairs with known no epidemiological link belonging to the same CC (blue); pairs with known no epidemiological link belonging to a different CC (red);



Table S6. CC8 core hqSNV distance matrix

| Outbreak Investigation | Strain<br>(2008 deli meat investigation) | Isolate | 10-1321 | 10-1046 | 10-1047 | 10-5024 | 08-6569 | 08-6997 | 08-5578 | 08-6056 | 10-0815 | 10-0814 | 08-7374 | 08-7362 | 08-7363 | 08-7364 | 08-7669 | 08-5923 | 98-0291 | 01-1280 | 04-5457 | 99-6370 | 98-2035 | 95-0093 | 88-0478 | 01-1468 | 01-6771 | 99-6871 | 03-5473 | 88-1059 | 01-5252 | 02-5993 | 11-4254 | 10-0819 | # Isolate Type |
|------------------------|------------------------------------------|---------|---------|---------|---------|---------|---------|---------|---------|---------|---------|---------|---------|---------|---------|---------|---------|---------|---------|---------|---------|---------|---------|---------|---------|---------|---------|---------|---------|---------|---------|---------|---------|---------|----------------|
|                        |                                          |         | C       | C       | C       | F       | FPE     | C       | C       | C       | C       | C       | C       | FPE     | FPE     | FPE     | C       | C       | C       | C       | C       | C       | C       | C       | C       | C       | C       | C       | C       | C       | C       | C       | C       | C       | C              |
| 2010 Prosciutto        |                                          | 10-1321 | 0       | 1       | 1       | 5       | 24      | 24      | 23      | 23      | 23      | 24      | 24      | 27      | 27      | 27      | 34      | 7       | 27      | 24      | 23      | 23      | 21      | 19      | 18      | 32      | 29      | 29      | 27      | 25      | 23      | 23      | 104     | 147     |                |
|                        |                                          | 10-1046 | 1       | 0       | 0       | 4       | 23      | 23      | 22      | 22      | 22      | 23      | 23      | 26      | 26      | 26      | 33      | 6       | 26      | 23      | 22      | 22      | 20      | 18      | 17      | 31      | 28      | 28      | 26      | 24      | 22      | 22      | 103     | 146     |                |
|                        |                                          | 10-1047 | 1       | 0       | 0       | 4       | 23      | 23      | 22      | 22      | 22      | 23      | 23      | 26      | 26      | 26      | 33      | 6       | 26      | 23      | 22      | 22      | 20      | 18      | 17      | 31      | 28      | 28      | 26      | 24      | 22      | 22      | 103     | 146     |                |
|                        |                                          | 10-5024 | 5       | 4       | 4       | 0       | 23      | 23      | 22      | 22      | 22      | 23      | 23      | 26      | 26      | 26      | 33      | 6       | 26      | 23      | 22      | 22      | 20      | 18      | 17      | 31      | 28      | 28      | 26      | 24      | 22      | 22      | 103     | 146     |                |
|                        | 1                                        | 08-6569 | 24      | 23      | 23      | 23      | 0       | 2       | 1       | 1       | 1       | 2       | 4       | 21      | 21      | 21      | 28      | 25      | 9       | 4       | 3       | 5       | 5       | 13      | 18      | 26      | 31      | 31      | 21      | 25      | 23      | 23      | 106     | 149     |                |
|                        | 1                                        | 08-6997 | 24      | 23      | 23      | 23      | 2       | 0       | 1       | 1       | 1       | 2       | 4       | 21      | 21      | 21      | 28      | 25      | 9       | 4       | 3       | 5       | 5       | 13      | 18      | 26      | 31      | 31      | 21      | 25      | 23      | 23      | 106     | 149     |                |
| 2008 deli meat         | 1                                        | 08-5578 | 23      | 22      | 22      | 22      | 1       | 1       | 0       | 0       | 0       | 1       | 3       | 20      | 20      | 20      | 27      | 24      | 8       | 3       | 2       | 4       | 4       | 12      | 17      | 25      | 30      | 30      | 20      | 24      | 22      | 22      | 105     | 148     |                |
|                        | 1                                        | 08-6056 | 23      | 22      | 22      | 22      | 1       | 1       | 0       | 0       | 0       | 1       | 3       | 20      | 20      | 20      | 27      | 24      | 8       | 3       | 2       | 4       | 4       | 12      | 17      | 25      | 30      | 30      | 20      | 24      | 22      | 22      | 105     | 148     |                |
|                        | 1                                        | 10-0815 | 23      | 22      | 22      | 22      | 1       | 1       | 0       | 0       | 0       | 1       | 3       | 20      | 20      | 20      | 27      | 24      | 8       | 3       | 2       | 4       | 4       | 12      | 17      | 25      | 30      | 30      | 20      | 24      | 22      | 22      | 105     | 148     |                |
|                        | 2                                        | 10-0814 | 24      | 23      | 23      | 23      | 2       | 2       | 1       | 1       | 1       | 0       | 4       | 21      | 21      | 21      | 28      | 25      | 9       | 4       | 3       | 5       | 5       | 13      | 18      | 26      | 31      | 31      | 21      | 25      | 23      | 23      | 106     | 149     |                |
|                        | 3                                        | 08-7374 | 24      | 23      | 23      | 23      | 4       | 4       | 3       | 3       | 3       | 4       | 0       | 21      | 21      | 21      | 28      | 25      | 9       | 4       | 3       | 5       | 5       | 13      | 18      | 26      | 31      | 31      | 21      | 25      | 23      | 23      | 106     | 149     |                |
|                        |                                          | 08-7362 | 27      | 26      | 26      | 26      | 21      | 21      | 20      | 20      | 20      | 21      | 21      | 0       | 0       | 0       | 31      | 28      | 24      | 21      | 20      | 20      | 18      | 16      | 21      | 29      | 34      | 34      | 24      | 28      | 26      | 26      | 109     | 152     |                |
|                        | 4                                        | 08-7363 | 27      | 26      | 26      | 26      | 21      | 21      | 20      | 20      | 20      | 21      | 21      | 0       | 0       | 0       | 31      | 28      | 24      | 21      | 20      | 20      | 18      | 16      | 21      | 29      | 34      | 34      | 24      | 28      | 26      | 26      | 109     | 152     |                |
|                        |                                          | 08-7364 | 27      | 26      | 26      | 26      | 21      | 21      | 20      | 20      | 20      | 21      | 21      | 0       | 0       | 0       | 31      | 28      | 24      | 21      | 20      | 20      | 18      | 16      | 21      | 29      | 34      | 34      | 24      | 28      | 26      | 26      | 109     | 152     |                |
|                        | 5                                        | 08-7669 | 34      | 33      | 33      | 33      | 28      | 28      | 27      | 27      | 27      | 28      | 28      | 31      | 31      | 31      | 0       | 35      | 31      | 28      | 27      | 27      | 25      | 23      | 28      | 36      | 41      | 41      | 31      | 35      | 33      | 33      | 116     | 159     |                |
|                        | 6                                        | 08-5923 | 7       | 6       | 6       | 6       | 25      | 25      | 24      | 24      | 24      | 25      | 25      | 28      | 28      | 28      | 35      | 0       | 28      | 25      | 24      | 24      | 22      | 20      | 19      | 33      | 30      | 30      | 28      | 26      | 24      | 24      | 105     | 148     |                |
|                        |                                          | 98-0291 | 27      | 26      | 26      | 26      | 9       | 9       | 8       | 8       | 8       | 9       | 9       | 24      | 24      | 24      | 31      | 28      | 0       | 9       | 8       | 8       | 8       | 16      | 21      | 29      | 34      | 34      | 24      | 28      | 26      | 26      | 109     | 152     |                |
|                        |                                          | 01-1280 | 24      | 23      | 23      | 23      | 4       | 4       | 3       | 3       | 3       | 4       | 4       | 21      | 21      | 21      | 28      | 25      | 9       | 0       | 3       | 5       | 5       | 13      | 18      | 26      | 31      | 31      | 21      | 25      | 23      | 23      | 106     | 149     |                |
|                        |                                          | 04-5457 | 23      | 22      | 22      | 22      | 3       | 3       | 2       | 2       | 2       | 3       | 3       | 20      | 20      | 20      | 27      | 24      | 8       | 3       | 0       | 4       | 4       | 12      | 17      | 25      | 30      | 30      | 20      | 24      | 22      | 22      | 105     | 148     |                |
|                        |                                          | 99-6370 | 23      | 22      | 22      | 22      | 5       | 5       | 4       | 4       | 4       | 5       | 5       | 20      | 20      | 20      | 27      | 24      | 8       | 5       | 4       | 0       | 4       | 12      | 17      | 25      | 30      | 30      | 20      | 24      | 22      | 22      | 105     | 148     |                |
|                        | 98-2035                                  | 21      | 20      | 20      | 20      | 5       | 5       | 4       | 4       | 4       | 5       | 5       | 18      | 18      | 18      | 25      | 22      | 8       | 5       | 4       | 4       | 0       | 10      | 15      | 23      | 28      | 28      | 18      | 22      | 20      | 20      | 103     | 146     |         |                |
|                        | 95-0093                                  | 19      | 18      | 18      | 18      | 13      | 13      | 12      | 12      | 12      | 13      | 13      | 16      | 16      | 16      | 23      | 20      | 16      | 13      | 12      | 12      | 10      | 0       | 13      | 17      | 26      | 26      | 12      | 20      | 18      | 18      | 101     | 144     |         |                |
|                        | 88-0478                                  | 18      | 17      | 17      | 17      | 18      | 18      | 17      | 17      | 17      | 18      | 18      | 21      | 21      | 21      | 28      | 19      | 21      | 18      | 17      | 17      | 15      | 13      | 0       | 26      | 25      | 25      | 21      | 19      | 17      | 17      | 100     | 143     |         |                |
| Sporadic               |                                          | 01-1468 | 32      | 31      | 31      | 31      | 26      | 26      | 25      | 25      | 26      | 26      | 29      | 29      | 29      | 36      | 33      | 29      | 26      | 25      | 25      | 23      | 17      | 26      | 0       | 39      | 39      | 17      | 33      | 31      | 31      | 114     | 157     |         |                |
|                        |                                          | 01-6771 | 29      | 28      | 28      | 28      | 31      | 31      | 30      | 30      | 30      | 31      | 31      | 34      | 34      | 34      | 41      | 30      | 34      | 31      | 30      | 30      | 28      | 26      | 25      | 39      | 0       | 8       | 34      | 32      | 30      | 30      | 111     | 154     |                |
|                        |                                          | 99-6871 | 29      | 28      | 28      | 28      | 31      | 31      | 30      | 30      | 30      | 31      | 31      | 34      | 34      | 34      | 41      | 30      | 34      | 31      | 30      | 30      | 28      | 26      | 25      | 39      | 8       | 0       | 34      | 32      | 30      | 30      | 111     | 154     |                |
|                        |                                          | 03-5473 | 27      | 26      | 26      | 26      | 21      | 21      | 20      | 20      | 20      | 21      | 21      | 24      | 24      | 24      | 31      | 28      | 24      | 21      | 20      | 20      | 18      | 12      | 21      | 17      | 34      | 34      | 0       | 28      | 26      | 26      | 109     | 152     |                |
|                        |                                          | 88-1059 | 25      | 24      | 24      | 24      | 25      | 25      | 24      | 24      | 24      | 25      | 25      | 28      | 28      | 28      | 35      | 26      | 28      | 25      | 24      | 24      | 22      | 20      | 19      | 33      | 32      | 32      | 28      | 0       | 20      | 20      | 107     | 150     |                |
|                        |                                          | 01-5252 | 23      | 22      | 22      | 22      | 23      | 23      | 22      | 22      | 22      | 23      | 23      | 26      | 26      | 26      | 33      | 24      | 26      | 23      | 22      | 22      | 20      | 18      | 17      | 31      | 30      | 30      | 26      | 20      | 0       | 6       | 105     | 148     |                |
|                        |                                          | 02-5993 | 23      | 22      | 22      | 22      | 23      | 23      | 22      | 22      | 22      | 23      | 23      | 26      | 26      | 26      | 33      | 24      | 26      | 23      | 22      | 22      | 20      | 18      | 17      | 31      | 30      | 30      | 26      | 20      | 6       | 0       | 105     | 148     |                |
|                        |                                          | 11-4254 | 104     | 103     | 103     | 103     | 106     | 106     | 105     | 105     | 105     | 106     | 106     | 109     | 109     | 109     | 116     | 105     | 109     | 106     | 105     | 105     | 103     | 101     | 100     | 114     | 111     | 111     | 109     | 107     | 105     | 105     | 0       | 183     |                |
|                        |                                          | 10-0819 | 147     | 146     | 146     | 146     | 149     | 149     | 148     | 148     | 148     | 149     | 149     | 152     | 152     | 152     | 159     | 148     | 152     | 149     | 148     | 148     | 144     | 143     | 157     | 154     | 154     | 152     | 150     | 148     | 148     | 183     | 0       |         |                |

# Isolate types: C, Clinical; F, Food; FPE, Food processing environment.

\*Isolates originally included in outbreak investigation due to PFGE patterns that were later excluded due to contrary epidemiological evidence.

Note: Outbreak isolates without epidemiological links to outbreak were omitted from pairwise analysis (Figure 2). Epidemiologically-related pairs (green); pairs with known no epidemiological link belonging to the same CC (blue); pairs with known no epidemiological link belonging to a different CC (red);

**Table S7. Publically *Listeria monocytogenes* genomes**

| Strain                | Year Isolated | Strain Background                                                                   | Location           | Specimen type | Source                                | Serotype | MLST | Clonal Complex | Epidemiology                                                                                                                             | Accession    | Reference |
|-----------------------|---------------|-------------------------------------------------------------------------------------|--------------------|---------------|---------------------------------------|----------|------|----------------|------------------------------------------------------------------------------------------------------------------------------------------|--------------|-----------|
| F2365                 | 1985          | Mexican style soft cheese outbreak, 1985                                            | California, USA    | Food          | Cheese                                | 4b       | 1    | 1              | 142 cases including 48 deaths (20 in utero, 10 neonates, 18 adults)                                                                      | AE017262     | [4,5]     |
| FSL N1-017            |               |                                                                                     |                    | Food          | Trout in brine                        | 4b       | 3    | 3              | Not associated with human disease                                                                                                        | AARP00000000 | [4,6]     |
| Clip80459             | 1999          | Jellied pork tongue outbreak, 1999                                                  | France             | Human         |                                       | 4b       | 4    | 4              | 32 cases: CNS listeriosis, bacteremia, 6 deaths (5 adult, 1 in utero), 7 premature births                                                | FM242711.1   | [4,7]     |
| HPB2262 (Aurelii1997) | 1997          | Corn salad outbreak, 1997                                                           | Northern Italy     | Human         | Corn salad (from 2 School cafeterias) | 4b       | 2    | 2              | 1700 cases including 292 hospitalized (febrile gastroenteritis, mostly children)                                                         | AATL00000000 | [4,8]     |
| ScottA                | 1983          | Pasteurized milk outbreak, 1983                                                     | Massachusetts, USA | Human         |                                       | 4b       | 2    | 2              | 49 cases: 7 fetus/infant, 42 adult, 14 deaths                                                                                            | CM001159     | [4,9,10]  |
| FSL R2-503 (G6054)    | 1994          | Sporadic febrile gastroenteritis clinical case associated with chocolate milk, 1994 | Illinois, USA      | Human         | Stool                                 | 1/2b     | 3    | 3              | 45 cases including 4 hospitalizations, 0 deaths                                                                                          | AARR00000000 | [4,11,12] |
| FSL J1-194            |               | Sporadic clinical case                                                              | USA                | Human         | Unknown                               | 1/2b     | 88   |                | Sporadic                                                                                                                                 | AARJ00000000 | [4,11]    |
| FSL J1-175            |               |                                                                                     |                    | Environment   | Water                                 | 1/2b     | 87   |                | Environmental isolate, not associated with disease                                                                                       | AARK00000000 | [4,11]    |
| FSL J2-064            |               |                                                                                     | USA                | Human         |                                       | 1/2b     | 5    | 5              |                                                                                                                                          | CP006592     | [4,6]     |
| 10403S                | 1987          | Lab derived strain                                                                  | USA                | Mouse         |                                       | 1/2a     | 85   | 7              | Common lab strain, streptomycin resistant derivative of strain 10403 isolated from human skin lesion in 1968 at Montana State University | CP002002     | [4,13]    |
| EGD                   | 1924          |                                                                                     | UK                 | Lab strain    |                                       | 1/2a     | 12   | 7              | Derived from original strain isolated from rabbits by E.G.D. Murray                                                                      | HG421741     | [4,14]    |
| EGD-e                 | 1960          |                                                                                     | France             | Lab strain    | Unknown                               | 1/2a     | 35   | 9              | EGD obtained from Trudeau institute                                                                                                      | AL591824     | [4,5]     |
| J2818                 | 2000          | RTE turkey deli meat outbreak, 2000                                                 | USA                | Food          | RTE turkey                            | 1/2a     | 86   |                | Processed turkey outbreak in 11 states sourced to single processing plant                                                                | AARX00000000 | [4,15]    |
| J0161 (FSL R2-499)    | 2000          |                                                                                     |                    | Human         |                                       | 1/2a     | 11   |                |                                                                                                                                          | CP002001     |           |
| F6900                 | 1989          | Sporadic clinical case, 1989                                                        | USA                | Human         |                                       | 1/2a     | 86   |                | Linked to processed meat from same facility as J0161 & J2818 isolates 11 yrs later                                                       | AARU00000000 | [11]      |
| FSL N3-165            |               |                                                                                     | USA                | Environment   | Soil                                  | 1/2a     | 90   | 90             | Not associated with disease                                                                                                              | AARQ00000000 | [4,16]    |
| Finland 1998          | 1999          | Dairy butter outbreak, 1999                                                         | Finland            |               |                                       | 3a       |      |                | 25 cases including 20 sepsis, 4 meningitis, 1 abscess; 6 deaths                                                                          | CP002004     | [11,17]   |
| FSL R2-561            |               |                                                                                     |                    |               |                                       | 1/2c     |      |                |                                                                                                                                          | CP002003     | [11]      |

|            |       |                            |              |        |               |      |     |    |                                          |                   |           |
|------------|-------|----------------------------|--------------|--------|---------------|------|-----|----|------------------------------------------|-------------------|-----------|
| LO28       | <1985 | <1985                      |              | Human  | Stool         | 1/2c | 210 | 9  | Feces of healthy, pregnant clinical case | AARY00000000      | [4,11,18] |
| FSL J1-208 | 1998  | Farm animal outbreak, 1998 | Georgia, USA | Animal | Caprine brain | 4a   |     |    |                                          | CM001469/CM001470 | [11,19]   |
| HCC23      | 2000  | 2000                       |              | Fish   | Catfish brain | 4a   |     |    | Naturally avirulent                      | CP001175          | [20]      |
| L99        | 1950s | 1950's                     | Netherlands  | Food   |               | 4a   |     |    | Weakly pathogenic to humans              | FM211688          | [21,22]   |
| FSL J2-071 |       | Clinical animal case       |              | Animal |               | 4c   | 131 | 71 |                                          | AARN00000000      | [11]      |

Table S8. Sequences of substituted primers used for MLST

| Primer            | Sequence                                    |
|-------------------|---------------------------------------------|
| <i>NMLcat-R*</i>  | CAGGAAACAGCTATGACCGCTTGCTCCGTCGAAAGGTTC     |
| <i>NMLdapE-R*</i> | CAGGAAACAGCTATGACCATCGAACTATGGGSATTTTTACC   |
| <i>NMLdat-R*</i>  | CAGGAAACAGCTATGACCTGCGTCCATAATACACCRCTTTT   |
| <i>NMLldh-F*</i>  | GTAAAACGACGGCCAGTGGATTTRAGCCATGCCGTTCC      |
| <i>NMLldh-R*</i>  | CAGGAAACAGCTATGACCACRCCGTAGAATGTAGCGCC      |
| <i>NMLlhkA-F*</i> | GTAAAACGACGGCCAGTCAAAGCCAAGTAGATGACTTAAC    |
| <i>lhk-R2#</i>    | CAGGAAACAGCTATGACCTACGCATTTTCATGAGAAACATCAG |

\* Primers for MLST were modified from Ragon et al. [1], based on an alignment of the following *L. monocytogenes* genomes ( $n=16$ ): (08-5578, 08-5923, 08-6997, 08-7669, 10-0933, 10-1046, 10-4754, 10-4758, 10-5026, 81-0861, 98-2035, 99-6370, Clip81459, EGD-e, F2365, HCC23) at the seven MLST loci. Refer to **Tables S1** and **S2** for accession numbers. Specifically, the *cat* reverse primer, *ldh* forward and reverse primers, and the *lhkA* forward primer were redesigned, the *dapE* reverse and *dat* reverse primers had degenerate base substitutions.

# *lhkA-R2* ([www.pasteur.fr/mlst](http://www.pasteur.fr/mlst)) was used to replace the *lhkA* reverse primer

## Supplemental References

- [1] **Ragon M, Wirth T, Hollandt F, Lavenir R, Lecuit M, Le Monnier A, et al.** A new perspective on *Listeria monocytogenes* evolution. *PLoS Pathog* 2008 Sep 5;4(9):e1000146.
- [2] **Larkin MA, Blackshields G, Brown NP, Chenna R, McGettigan PA, McWilliam H, et al.** Clustal W and Clustal X version 2.0. *Bioinformatics* 2007 Nov 1;23(21):2947-2948.
- [3] **Darling AE, Mau B, Perna NT.** progressiveMauve: multiple genome alignment with gene gain, loss and rearrangement. *PLoS One* 2010 Jun 25;5(6):e11147.
- [4] **Cantinelli T, Chenal-Francisque V, Diancourt L, Frezal L, Leclercq A, Wirth T, et al.** "Epidemic clones" of *Listeria monocytogenes* are widespread and ancient clonal groups. *J Clin Microbiol* 2013 Nov;51(11):3770-3779.
- [5] **Glaser P, Frangeul L, Buchrieser C, Rusniok C, Amend A, Baquero F, et al.** Comparative genomics of *Listeria* species. *Science* 2001 Oct 26;294(5543):849-852.
- [6] **Gray MJ, Zadoks RN, Fortes ED, Dogan B, Cai S, Chen Y, et al.** *Listeria monocytogenes* isolates from foods and humans form distinct but overlapping populations. *Appl Environ Microbiol* 2004 Oct;70(10):5833-5841.
- [7] **de Valk H, Vaillant V, Jacquet C, Rocourt J, Le Querrec F, Stainer F, et al.** Two consecutive nationwide outbreaks of Listeriosis in France, October 1999-February 2000. *Am J Epidemiol* 2001 Nov 15;154(10):944-950.
- [8] **Aureli P, Fiorucci GC, Caroli D, Marchiaro G, Novara O, Leone L, et al.** An outbreak of febrile gastroenteritis associated with corn contaminated by *Listeria monocytogenes*. *N Engl J Med* 2000 Apr 27;342(17):1236-1241.
- [9] **Briers Y, Klumpp J, Schuppler M, Loessner MJ.** Genome sequence of *Listeria monocytogenes* Scott A, a clinical isolate from a food-borne listeriosis outbreak. *J Bacteriol* 2011 Aug;193(16):4284-4285.
- [10] **Fleming DW, Cochi SL, MacDonald KL, Brondum J, Hayes PS, Plikaytis BD, et al.** Pasteurized milk as a vehicle of infection in an outbreak of listeriosis. *N Engl J Med* 1985 Feb 14;312(7):404-407.
- [11] **Wiedmann M, Swaminathan B, Lauer P, Portnoy D, Cossart P, Buchrieser C, et al.** *Listeria monocytogenes* Database. Available at: [http://www.broadinstitute.org/annotation/genome/listeria\\_group/GenomeDescriptions.html](http://www.broadinstitute.org/annotation/genome/listeria_group/GenomeDescriptions.html). Accessed 09/25, 2015.
- [12] **Dalton CB, Austin CC, Sobel J, Hayes PS, Bibb WF, Graves LM, et al.** An outbreak of gastroenteritis and fever due to *Listeria monocytogenes* in milk. *N Engl J Med* 1997 Jan 9;336(2):100-105.
- [13] **Bishop DK, Hinrichs DJ.** Adoptive transfer of immunity to *Listeria monocytogenes*. The influence of in vitro stimulation on lymphocyte subset requirements. *J Immunol* 1987 Sep 15;139(6):2005-2009.
- [14] **Becavin C, Bouchier C, Lechat P, Archambaud C, Creno S, Gouin E, et al.** Comparison of widely used *Listeria monocytogenes* strains EGD, 10403S, and EGD-e highlights genomic variations underlying differences in pathogenicity. *MBio* 2014 Mar 25;5(2):e00969-14.
- [15] **Olsen SJ, Patrick M, Hunter SB, Reddy V, Kornstein L, MacKenzie WR, et al.** Multistate outbreak of *Listeria monocytogenes* infection linked to delicatessen turkey meat. *Clin Infect Dis* 2005 Apr 1;40(7):962-967.
- [16] **Nightingale KK, Schukken YH, Nightingale CR, Fortes ED, Ho AJ, Her Z, et al.** Ecology and transmission of *Listeria monocytogenes* infecting ruminants and in the farm environment. *Appl Environ Microbiol* 2004 Aug;70(8):4458-4467.
- [17] **Lyytikainen O, Autio T, Maijala R, Ruutu P, Honkanen-Buzalski T, Miettinen M, et al.** An outbreak of *Listeria monocytogenes* serotype 3a infections from butter in Finland. *J Infect Dis* 2000 May;181(5):1838-1841.



[18] **Vicente MF, Baquero F, Pérez-Díaz JC.** Cloning and expression of the *Listeria monocytogenes* haemolysin in *Escherichia coli*. *FEMS Microbiology Letters* 1985;30(1-2):77–79.

[19] **den Bakker HC, Bowen BM, Rodríguez-Rivera LD, Wiedmann M.** FSL J1-208, a virulent uncommon phylogenetic lineage IV *Listeria monocytogenes* strain with a small chromosome size and a putative virulence plasmid carrying internalin-like genes. *Appl Environ Microbiol* 2012 Mar;78(6):1876-1889.

[20] **Steele CL, Donaldson JR, Paul D, Banes MM, Arick T, Bridges SM, et al.** Genome sequence of lineage III *Listeria monocytogenes* strain HCC23. *J Bacteriol* 2011 Jul;193(14):3679-3680.

[21] **Hain T, Ghai R, Billion A, Kuenne CT, Steinweg C, Izar B, et al.** Comparative genomics and transcriptomics of lineages I, II, and III strains of *Listeria monocytogenes*. *BMC Genomics* 2012 Apr 24;13:144-2164-13-144.

[22] **Kuenne C, Billion A, Mraheil MA, Strittmatter A, Daniel R, Goesmann A, et al.** Reassessment of the *Listeria monocytogenes* pan-genome reveals dynamic integration hotspots and mobile genetic elements as major components of the accessory genome. *BMC Genomics* 2013 Jan 22;14:47-2164-14-47.
